1 **Mangroves are an overlooked hotspot of insect diversity despite low plant diversity**

2

3 **Darren Yeo<sup>1</sup>, Amrita Srivathsan<sup>1</sup>, Jayanthi Puniamoorthy<sup>1</sup>, Foo Maosheng<sup>2</sup>, Patrick**  
4 **Grootaert<sup>3</sup>, Lena Chan<sup>4</sup>, Benoit Guénard<sup>5</sup>, Claas Damken<sup>6</sup>, Rodzay A. Wahab<sup>6</sup>, Ang**  
5 **Yuchen<sup>2</sup>, Rudolf Meier<sup>1</sup>**

6

7

8 <sup>1</sup>Department of Biological Sciences, National University of Singapore, 14 Science 8 Drive 4,  
9 Singapore 117543

10 <sup>2</sup>Lee Kong Chian Natural History Museum, National University of Singapore, 2 Conservatory  
11 Drive, Singapore 117377

12 <sup>3</sup>Royal Belgian Institute of Natural Sciences, Brussels, Belgium and National Biodiversity  
13 Centre, National Parks Board, Singapore

14 <sup>4</sup>International Biodiversity Conservation Division, National Parks Board, 1 Cluny Road,  
15 259569 Singapore

16 <sup>5</sup>School of Biological Sciences, The University of Hong Kong, Kadoorie Biological Sciences  
17 Building, Pok Fu Lam Road, Hong Kong, SAR, China

18 <sup>6</sup>Institute for Biodiversity and Environmental Research, Universiti Brunei Darussalam, Jalan  
19 Universiti, BE1410, Brunei Darussalam

20

21 **Abstract**

22 We here compare the tropical arthropod fauna across a freshwater swamp and six different  
23 forest types (rain-, swamp, dry-coastal, urban, freshwater swamp, mangroves) based on  
24 140,000 specimens belonging to ca. 8,500 species. Surprisingly, we find that mangroves, a  
25 globally imperiled habitat that had been expected to be species-poor for insects, are an  
26 overlooked hotspot for insect diversity despite having low plant diversity. Mangroves are very  
27 species-rich (>3,000 species) and distinct (>50% of species are mangrove-specific) with high  
28 species turnover across Southeast and East Asia. Overall, plant diversity is a good predictor  
29 for insect diversity for most habitats, but mangroves compensate for the low number of  
30 phytophagous and fungivorous species by supporting an unusually rich community of  
31 predators whose larvae feed in the productive mudflats. For the remaining habitats, the  
32 insect communities have diversity patterns that are largely congruent across guilds. The  
33 discovery of such a sizeable and distinct insect fauna in a globally threatened habitat  
34 underlines how little is known about global insect biodiversity.

35 **Keywords**

36 Insect biodiversity, Mangroves, NGS barcoding, species discovery, beta-diversity, global  
37 insect decline, Southeast Asia

38

## 39 **Introduction**

40           Insects are currently experiencing anthropogenic biodiversity meltdowns with  
41 declines having attracted much attention[1–4] and controversy[5–10]. The controversy is  
42 largely due to the paucity of high-quality data for arthropods, which is also responsible for  
43 imprecise estimates of global animal species richness[11,12] and understanding species  
44 turnovers[13–15]. These knowledge gaps are also likely to threaten the health of whole  
45 ecosystems given that arthropods provide a large number of important ecosystem  
46 services[3,16–19], contribute much of the animal biomass[20] and are yet frequently ignored  
47 in habitat assessments. The lack of baseline data is particularly worrisome at a time when  
48 tropical ecosystems are heavily impacted by habitat conversion and global change[21].

49           The situation is particularly dire for the species-rich tropics, for which so few  
50 comprehensive surveys have been conducted[22–24] that only three of the 73 studies in a  
51 recent review of insect declines involved tropical sites[8]. Furthermore, tropical insect  
52 surveys have traditionally focused on tropical rainforests[24], with other tropical habitats  
53 being largely neglected. Mangrove forests are a prime example of a tropical habitat for which  
54 the insect fauna is poorly characterized. Mangroves used to cover more than 200,000 km<sup>2</sup> of  
55 the global coastline[25], but have been experiencing an annual area loss of 1-2%[25,26].  
56 Indeed, the losses of mangroves far exceed those of more high-profile ecosystems such as  
57 rainforests and coral reefs[26]. Unfortunately, these losses are further exacerbated by  
58 climate change[27], with some simulations predicting a further reduction by 46–59% for all  
59 global coastal wetlands by the year 2100[28]. This is a particularly worrying trend as  
60 mangrove ecosystems have been found to be sequester more carbon per hectare than  
61 tropical dryland forests[29]. These changes will not only endanger entire ecosystems that  
62 provide essential ecosystem services[30–32], but also threaten the survival of numerous  
63 mangrove species with unique adaptations. Mangrove specialists with such adaptations are  
64 well known for vertebrates and vascular plants[33,34], but the invertebrate diversity is largely  
65 unknown.

66 One reason why the mangrove insect fauna is likely to have received little attention is  
67 the low plant diversity in mangroves. Tropical arthropod diversity is usually positively  
68 correlated with plant diversity[23,24,35] which implied that mangroves would provide few  
69 insights into understanding whether insect herbivores drive high plant diversity in the tropics  
70 [36–38] or high plant diversity was responsible for high insect diversity [22,39]. Arguably, the  
71 traditional focus on addressing this question had the undesirable side-effect that the insect  
72 fauna of habitats with low plant diversity received comparatively little interest. Yet, many of  
73 these habitats are threatened with destruction, with mangroves being a good example. The  
74 few existing studies of mangrove insects focused on specific taxa[40–42], only identified  
75 specimens to higher taxonomic levels[43–45], and/or lacked quantitative comparison with  
76 the insect fauna of adjacent habitats. Given these shortcomings, these studies yielded  
77 conflicting results[44,46,47] with some arguing that high salinity and/or low plant  
78 diversity[33,44,46] were responsible for a comparatively poor insect fauna, while others  
79 found high levels of species diversity and specialization[47].

80 Here, we present the results of a comprehensive study of species richness and  
81 turnover of arthropods across multiple tropical habitats. The assessment is based  
82 on >140,000 specimens collected over >4 years from mangroves, rainforests, swamp forests,  
83 disturbed secondary urban forests, dry coastal forests, and freshwater swamps in Singapore  
84 (Fig. S1). In addition, we assess the species richness and turnover of mangrove insects  
85 across East and Southeast Asia by including samples from Brunei, Thailand, and Hong  
86 Kong. Specifically, our study (1) estimates mangrove insect diversity, (2) evaluates the  
87 distinctness in reference to five different forest habitats, (3) analyzes the biodiversity patterns  
88 by ecological guild, and (4) determines species turnover across larger geographic scales.  
89 Most of the work was carried out in Singapore because it has a large variety of different  
90 habitats that occur within 40km on a small island (724 km<sup>2</sup>) that lacks major physical barriers.  
91 In addition, all habitats have experienced similar levels of habitat degradation or loss (>95%

92 overall loss of original vegetation cover[48]; ca. 90% loss of rainforest[49]; ca. 93% loss of  
93 swamp forest[50]; 91% loss for mangroves[51]).

94 A thorough assessment of insect biodiversity requires dense sampling over an  
95 extended period of time[52–54]. We sampled 107 sites using Malaise traps and  
96 subsequently processed specimens for 16 arthropod orders (Fig. S2) typically found in  
97 Malaise traps. The samples were typical in that Diptera and Hymenoptera comprised >75%  
98 of all specimens (Fig. S2) and these orders were therefore subsampled by taxon and  
99 ecological guild (Table S2). More than 140,000 specimens were NGS-barcoded[55] and  
100 grouped into putative species, which allowed for species richness and abundance  
101 estimates[56–58]. Contrary to expectations, we demonstrate that mangrove forests have a  
102 very distinct and rich insect fauna. In addition, the species turnover for all habitats in  
103 Singapore and the different mangrove sites in Asia is very high.

## 104 **Results**

### 105 *Species delimitation based on NGS barcodes*

106 We obtained 143,807 313-bp *cox1* barcodes, which were grouped into 8256–8903  
107 molecular operationally taxonomic units (mOTUs, henceforth referred to as species) using  
108 objective clustering[59] at different p-distance thresholds (2–4%; Table S5). An alternative  
109 species delimitation algorithm, USEARCH[60], yielded similar species richness estimates of  
110 8520–9315 species using the identity (--id) parameters 0.96–0.98. Most species boundaries  
111 were stable, with species numbers only varying by <12% across species delimitation  
112 techniques and parameters. We hence used the species generated via objective clustering  
113 at 3% p-distance for the analyses (see supplementary data Fig. S3 for results obtained with  
114 2% and 4%).

### 115 *Alpha-diversity across habitats*

116 We rarefied the species richness curves by sample coverage[61] (Fig. 1) for each  
117 habitat, as well as by the number of specimens processed (Fig. S3). In addition, we only

118 included trapping sites that had at least 100 barcoded individuals to prevent poorly-sampled  
119 sites from artificially inflating site dissimilarity. Alpha-diversity comparisons were made at the  
120 rarefaction point with the lowest coverage/number of specimens (i.e., swamp forest in Fig. 1,  
121 *top*). Our initial analysis compared the Alpha-diversity of rainforest, swamp forest, urban  
122 forest, freshwater swamp and coastal forest habitats and mangroves with all sites being  
123 grouped as a single habitat type. The species diversity of mangroves ( $1102.5 \pm 10.8$  species)  
124 is ca. 50-60% of the rarefied species richness of adjacent tropical primary/secondary forest  
125 ( $2188.4 \pm 42.6$  species) and swamp forest sites (1809 species) (Fig. 1a), but a site-specific  
126 analysis also revealed that two of the major mangrove sites in the study (PU & SB) have  
127 similar species richness as the freshwater swamp site after rarefaction (Fig. 1b). The species  
128 richness of a third mangrove site (SMO) was lower and more similar to the richness of an  
129 urban forest site. A newly regenerated mangrove (SMN), adjacent to an old-growth  
130 mangrove (SMO) had much lower species richness.

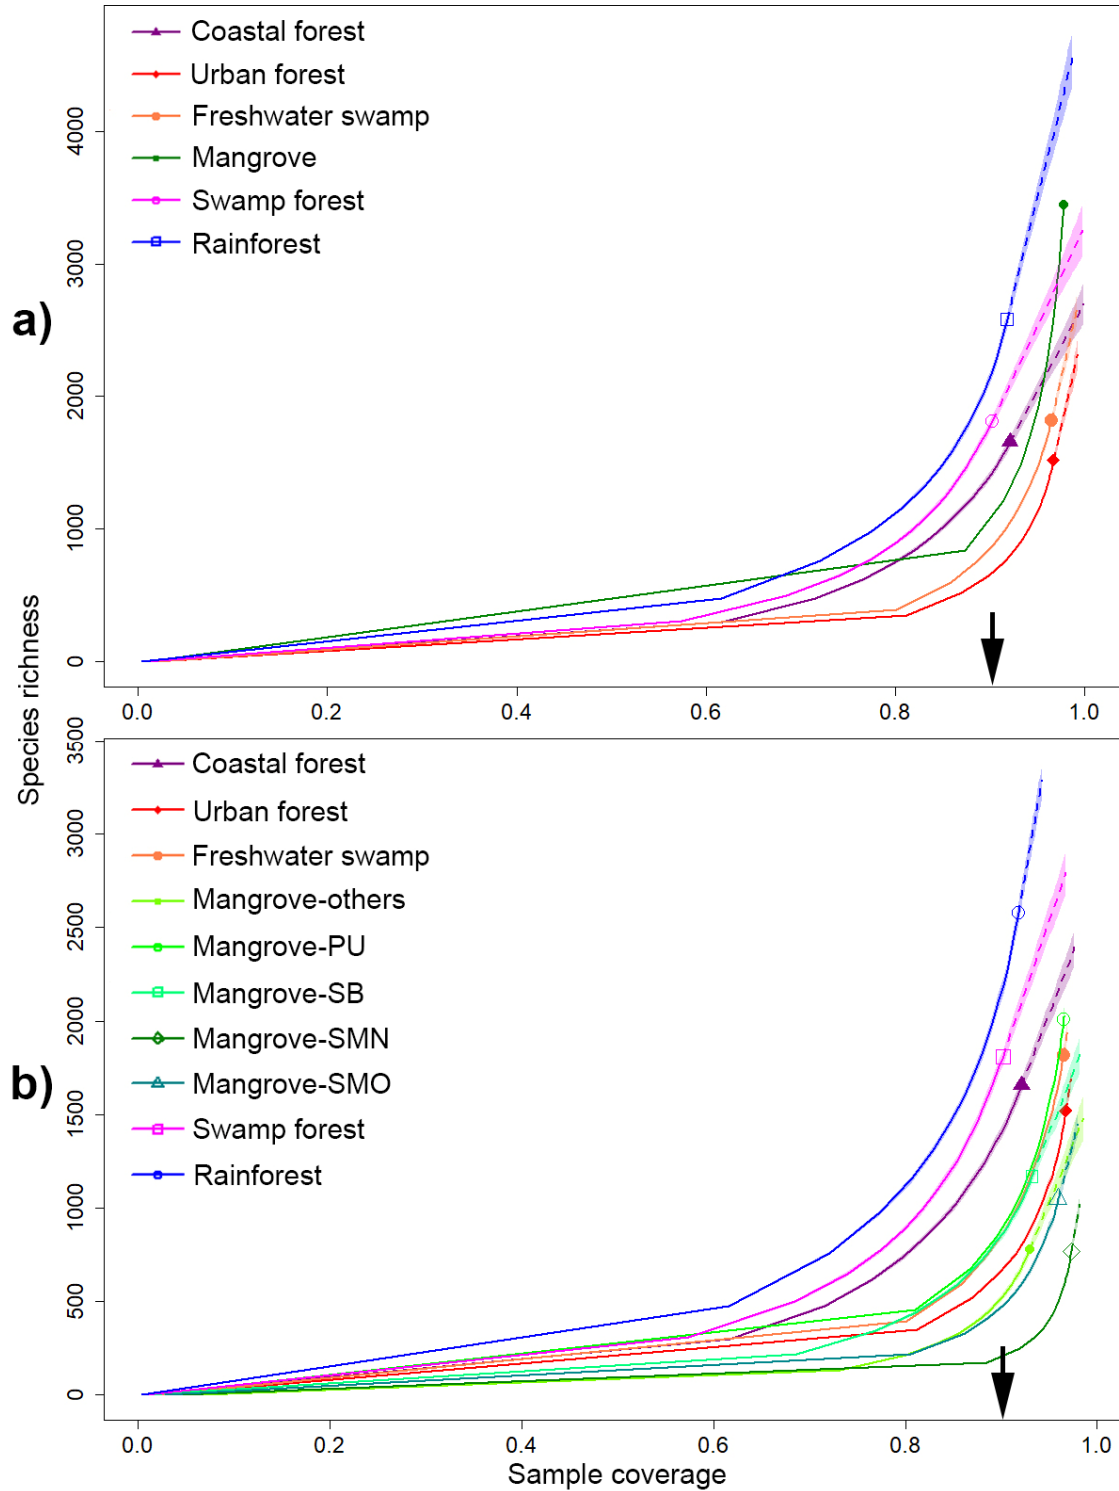

131

132 **Figure 1.** Insect alpha-diversity across tropical forest habitats. (a) Mangroves treated as one  
133 habitat; (b) Comparison of mangrove sites: Pulau Ubin (PU), Sungei Buloh (SB), Pulau  
134 Semakau old-growth (SMO), Pulau Semakau new-growth (SMN); solid lines = rarefaction;  
135 dotted = extrapolations. The arrow on the x-axis indicates the point of rarefaction at which  
136 species richness comparisons were made.

137 *Species turnover across habitats*

138 Mangrove arthropod communities are very distinct from those of the other habitats,  
139 with the communities from most habitats being well separated on NMDS plots (Fig. 2) even  
140 though several mangrove sites (PU, SB, SM) are geographically further from each other  
141 (>30 km) than from the other habitat types (Fig. S1). These patterns are also observed when  
142 the data are split into three taxon sets: (1) Diptera, (2) Hymenoptera, (3) remaining arthropod  
143 taxa (Fig. 2b). These results are also robust to the removal of rare species (Fig. 2a). Only 48  
144 (0.6%) of the 8572 putative species in the species turnover analysis are found in all habitat  
145 types while 5989 (69.9%) are only in a single type (Table S6); within the mangroves, 50.2%  
146 of the 3557 species are only known from the mangrove habitat. The habitat type the  
147 mangroves share the most species with is the coastal forest (873 of 3557 species, 24.5%).  
148 When rare species are removed (<10 specimens), 481 of the remaining 1773 species  
149 (27.1%) are found in a single habitat while only 48 (2.7%) are found in all (Table S6); i.e.,  
150 even after excluding rare species, a large proportion of the insect communities are putative  
151 habitat specialists.

152 Dissimilarity of the habitat-specific communities was confirmed with ANOSIM tests (Table  
153 1A), which find significant differences between communities in both global ( $P = 0.001$ ,  $R =$   
154  $0.784$ ) and pairwise habitat comparisons ( $P = 0.001 - 0.019$ ,  $R = 0.341 - 0.983$ ). The only  
155 exception are the coastal and urban forests ( $P = 0.079$ ,  $R = 0.172$ ) which may be due to the  
156 close proximity of Pulau Ubin coastal forest sites to urban settlements (Fig. S1). Note that a  
157 SIMPER analysis (Table 1B) finds a substantial number of shared species between the  
158 rainforest and swamp forest sites (13.88%). Both sites are in close geographic proximity  
159 (<5km; Fig. S1) and the within-habitat values for both sites are fairly high (rainforest =  
160 29.59%, swamp forest = 31.10%). ANOSIM and SIMPER results are again robust to the  
161 removal of rare species (Tables S7 & S8) and the ANOSIM p-values for most comparisons  
162 are significant even according to re-defined statistical criteria for unexpected or new results  
163 ( $p < 0.005$ )[62]. The observed dissimilarity was largely due to species turnover with the



164 turnover component (0.898) greatly outweighing nestedness (0.048; Table 1C & S9). This  
165 was similarly observed in most pairwise comparisons of habitats (turnover = 0.704 – 0.956,  
166 nestedness = 0.001 – 0.102). The only exception was mangroves and coastal forests  
167 (turnover = 0.658, nestedness = 0.254) which are in close geographic proximity on Pulau  
168 Ubin (Fig. 1).  
169

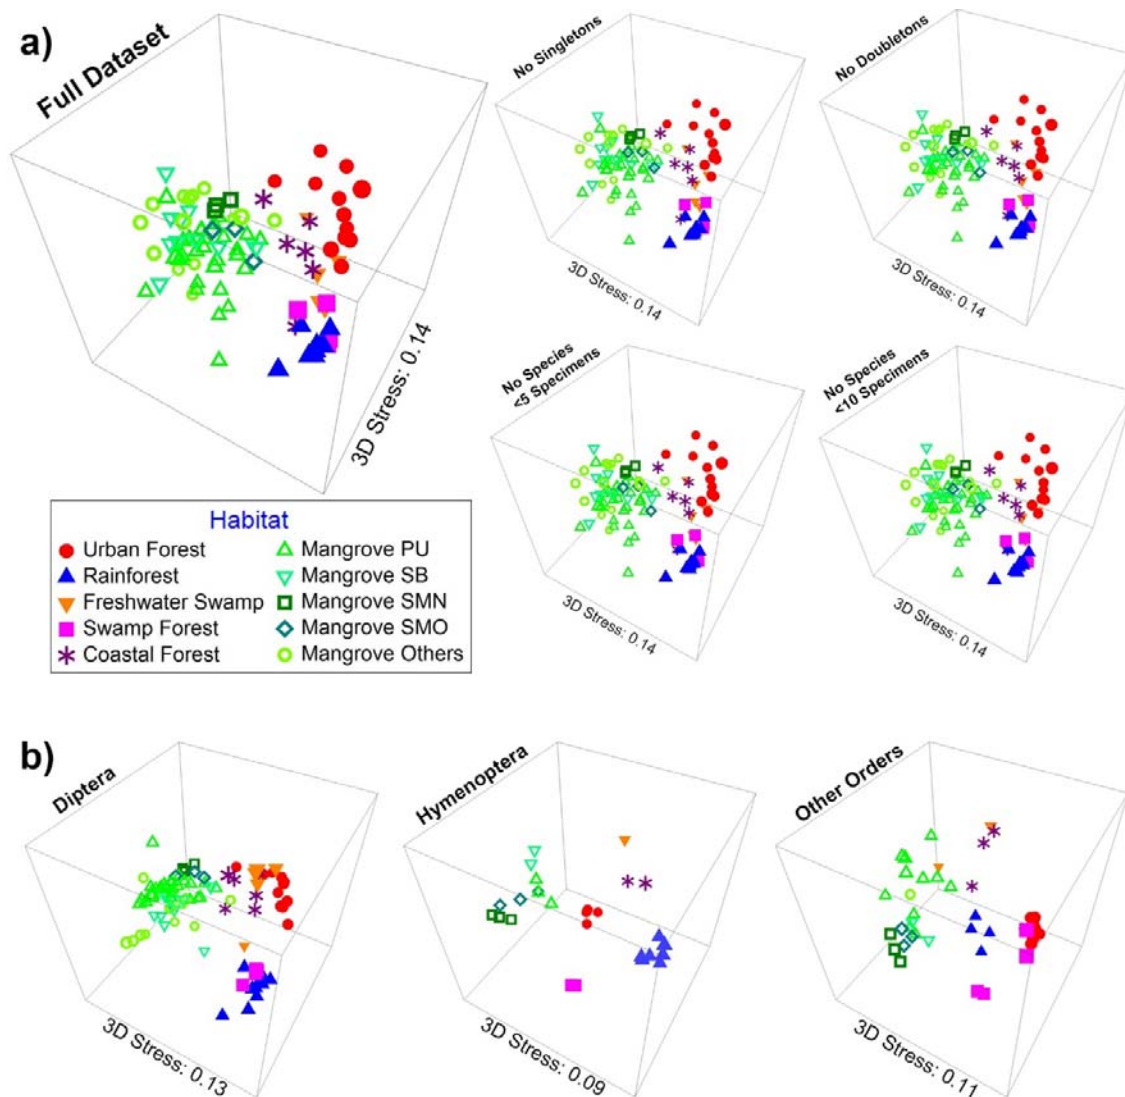

170  
171 **Figure 2.** Insect communities across tropical forest habitats are distinct based on Bray-  
172 Curtis distances illustrated on 3D NMDS plots, regardless of whether (a) rare species are  
173 removed or (b) the data are split into different taxonomic groups.

174

175

176 **Table 1.** Species turnover across habitats. (A) Distinctness of communities in each habitat  
 177 type as assessed with ANOSIM (pairwise p-value below and R-statistics above diagonal. (B)  
 178 Distinctness of communities in each habitat type as assessed with SIMPER. (C) Species  
 179 turnover and nestedness analysis (pairwise turnover values below and nestedness above  
 180 diagonal).

181 **A)**

Overall P: 0.001

Overall R: 0.784

|                  | Rainforest | Urban forest | Swamp forest | Mangrove | Freshwater swamp | Coastal forest |
|------------------|------------|--------------|--------------|----------|------------------|----------------|
| Rainforest       |            | 0.817        | 0.983        | 0.953    | 0.973            | 0.955          |
| Urban forest     | 0.001      |              | 0.759        | 0.815    | 0.575            | 0.172          |
| Swamp forest     | 0.001      | 0.001        |              | 0.934    | 0.769            | 0.893          |
| Mangrove         | 0.001      | 0.001        | 0.001        |          | 0.856            | 0.546          |
| Freshwater swamp | 0.001      | 0.001        | 0.008        | 0.001    |                  | 0.341          |
| Coastal forest   | 0.001      | 0.079        | 0.005        | 0.001    | 0.017            |                |

182

183 **B)**

|                  | Within habitat (%) | Between habitats (%) |              |              |          |                   |                |
|------------------|--------------------|----------------------|--------------|--------------|----------|-------------------|----------------|
|                  |                    | Rain-forest          | Urban forest | Swamp forest | Mangrove | Fresh-water swamp | Coastal forest |
| Rainforest       | 29.59              |                      |              |              |          |                   |                |
| Urban forest     | 12.91              | 3.20                 |              |              |          |                   |                |
| Swamp forest     | 31.10              | 13.88                | 2.94         |              |          |                   |                |
| Mangrove         | 12.25              | 1.62                 | 3.09         | 1.98         |          |                   |                |
| Freshwater swamp | 17.29              | 2.13                 | 4.69         | 4.10         | 2.74     |                   |                |
| Coastal forest   | 12.09              | 3.82                 | 9.41         | 4.00         | 6.08     | 9.05              |                |

184

185 **C)**

Overall Dissimilarity: 0.946

Overall Turnover: 0.898

Overall Nestedness: 0.048

|                  | Rainforest | Urban forest | Swamp forest | Mangrove | Freshwater swamp | Coastal forest |
|------------------|------------|--------------|--------------|----------|------------------|----------------|
| Rainforest       |            | 0.011        | 0.072        | 0.054    | 0.007            | 0.021          |
| Urban forest     | 0.916      |              | 0.028        | 0.097    | 0.005            | 0.102          |
| Swamp forest     | 0.710      | 0.922        |              | 0.092    | 0.027            | 0.001          |
| Mangrove         | 0.914      | 0.819        | 0.878        |          | 0.062            | 0.254          |
| Freshwater swamp | 0.956      | 0.891        | 0.932        | 0.878    |                  | 0.093          |
| Coastal forest   | 0.908      | 0.704        | 0.940        | 0.658    | 0.756            |                |

186

187 *Relationship between insect and plant richness*

188           Compared to mangroves (ca. 250 plant species), rainforest and swamp forest sites  
189 have 4.6 or 7.6 times the number of recorded plant species based on checklists for the sites  
190 (Table S4). This higher species richness is also confirmed by plot data for the rainforest[63]  
191 (839 species in 52 plots of 100m<sup>2</sup>) and swamp forest[64] (671 species in 40 plots of 400m<sup>2</sup>).  
192 However, the insect biodiversity of the rainforest and swamp forest sites is only 1.64 – 1.98  
193 times higher than in the mangroves after rarefaction.

194 *Analysis of ecological guilds and correlation between insect and plant diversity*

195           For this analysis, we focused primarily on the Diptera and Hymenoptera which  
196 occupy a broad range of ecological guilds and dominate Malaise trap samples (see Brown  
197 2005[65] & Hebert et al. 2016[66]). We also excluded trapping sites that were sampled for  
198 fewer than 6 months. We assigned insect species with known family/genus identities to  
199 ecological guilds (42,092 specimens belonging to 2,230 putative species) in order to  
200 understand how different habitats maintain insect diversity. After stepwise refinement of a  
201 multivariate ANCOVA model, the final model was defined as: *insectdiv* ~ *habitat* + *guild* +  
202 *plantdiv* + *guild:plantdiv* (*insectdiv*: rarefied insect species richness, *plantdiv*: plant species  
203 richness). The type-II sum of squares test reveal that guild and the interaction term between  
204 guild and plant diversity are highly significant factors ( $p < 0.001$ ), while plant diversity ( $p =$   
205  $0.063$ ) and habitat ( $p = 0.468$ ) are not. This suggests guild and plant diversity together have  
206 an important role in determining insect diversity but the precise relationship warranted further  
207 testing. Single variable linear regressions (*insectdiv* ~ *plantdiv*) were performed on each  
208 guild separately (Fig. 3) and plant diversity was found to only be highly significantly and  
209 positively correlated with the alpha-diversity of phytophagous and fungivorous insects ( $p <$   
210  $0.001$ ,  $R^2 = 0.992$  and  $0.990$ ,  $p = 0.886$  and  $0.943$  respectively).

211           After rarefaction, the different habitat types vary in composition (Fig. 4, see Table  
212 S10). Rainforest and freshwater swamp forest sites have higher numbers and proportions of

213 phytophagous and fungivorous insect species (see also Figs S4 & S5). The insect  
214 communities of mangroves, however, are characterized by an unusually high proportion of  
215 predatory species while the urban forest sites are dominated by parasitoids. With regard to  
216 species turnover, communities are separated by habitat for most guilds and pairwise  
217 comparisons (Fig. 5, Tables S11 & S12).

218

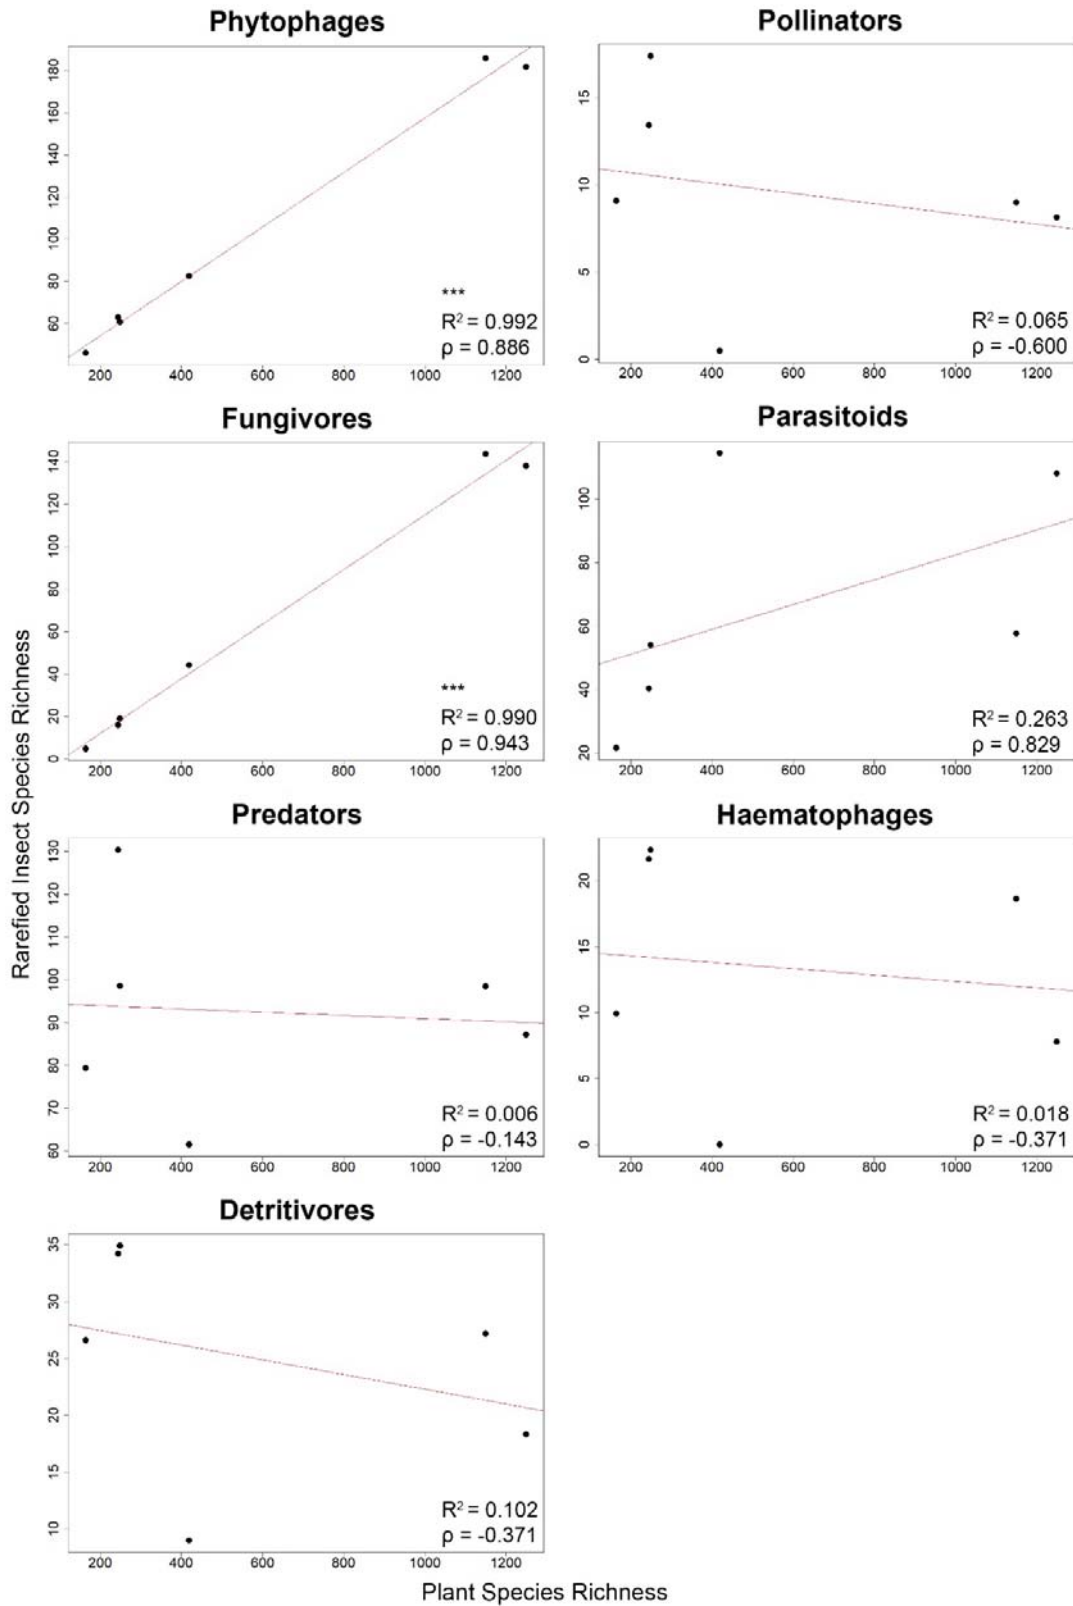

219

220 **Figure 3.** Only the diversity of phytophagous and fungivorous insects is correlated with plant  
221 diversity based on a linear regression model using rarefied insect species richness (\*:  $\leq 0.05$ ,  
222 \*\*:  $\leq 0.01$ , \*\*\*:  $\leq 0.001$ ).

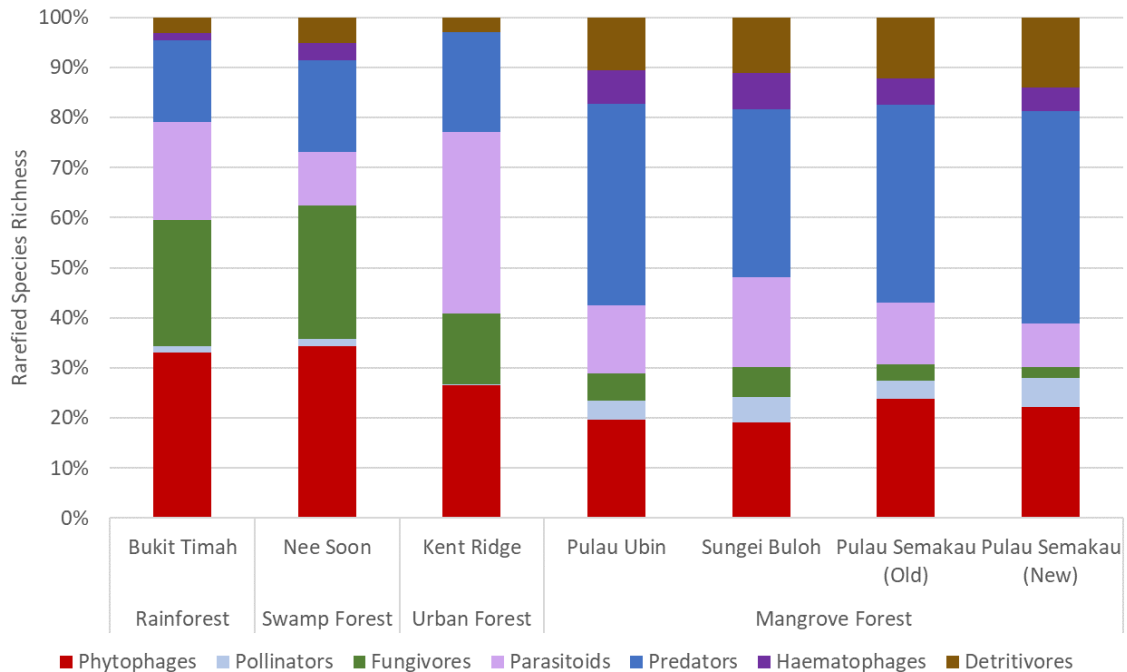

223

224 **Figure 4.** Distribution of insect guilds across habitats. Phytophages and fungivores dominate  
 225 in rain and swamp forest, predators in mangroves and parasitoids in the urban forest  
 226 (rarefied samples).

227

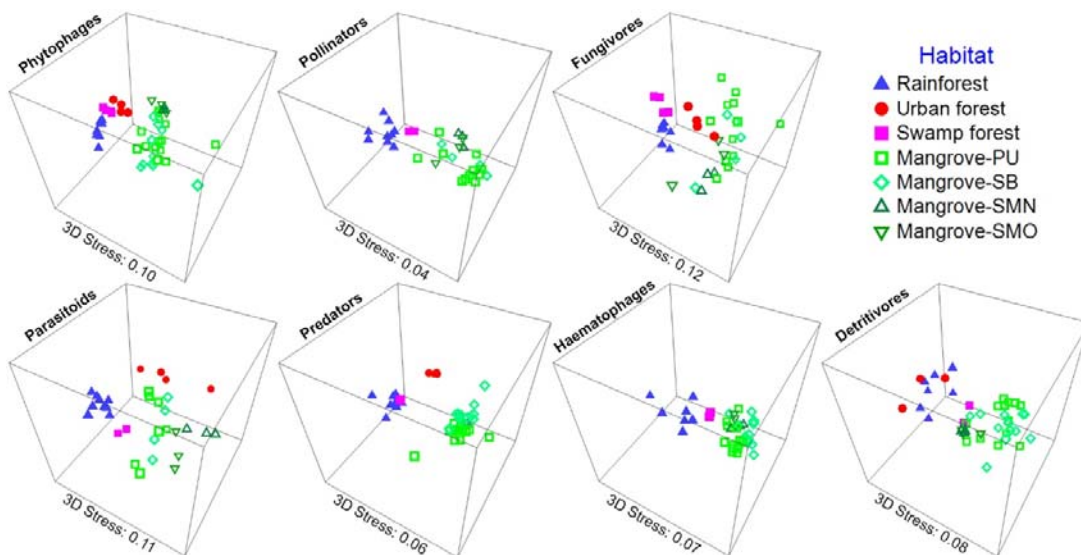

228

229 **Figure 5.** Habitat differentiation by insect guilds (3D NMDS plot of Bray-Curtis distances for  
 230 habitats with >2 sites).

231 *Species turnover across Asian mangroves*

232           The specimens from Hong Kong belonged to 109 dolichopodid, 129 phorid, and 25  
233 mycetophilid species. The corresponding number for Brunei were 96 and 76 species for  
234 dolichopodids and phorids, with too few mycetophilids being available for evaluation (Table  
235 S3). The southern Thai dolichopodids belonged to 74 species. We find high species turnover  
236 between Hong Kong, Brunei and Singapore, even after rarefying the specimen sample sizes  
237 (Fig. S6). Approximately 90% of all dolichopodid and phorid species are unique to each  
238 region and <1% are shared across all regions. Species turnover is even higher for the  
239 mycetophilids of Hong Kong and Singapore (>95%). Species turnover for the dolichopodids  
240 of Southern Thailand and Singapore is again high with only 11.5% of all species shared  
241 between both countries.

242

## 243 **Discussion**

### 244 *Discovery of a largely overlooked, predator-enriched insect community in mangroves*

245           It is often assumed that the insect diversity in mangroves is low because high salinity  
246 and low plant diversity are thought to interfere with insect diversification[23,67,68]. However,  
247 we here show that mangroves are species-rich despite low plant diversity (<250 species:  
248 [69–71]). In addition, the fauna of mangroves is very unique. More than half of its species  
249 are not found in other habitats, even though coastal forests are adjacent to mangroves.  
250 Indeed, after adjusting for sampling effort, the species diversity in Singapore's premier  
251 rainforest reserve (Bukit Timah Nature Reserve: 1.64 km<sup>2</sup>) and largest swamp forest  
252 remnant (Nee Soon: 5 km<sup>2</sup>) is only 50% higher than the diversity of major mangrove sites  
253 (PU: 0.904 km<sup>2</sup>, SB: 1.168 km<sup>2</sup>, SM: 0.174 km<sup>2</sup>). The high diversity encountered in the  
254 mangrove sites was particularly unexpected because the rainforests of Bukit Timah Nature  
255 Reserve have been protected for more than 50 years[72,73] and have very high plant  
256 diversity (e.g., 1,250 species of vascular plants[63] including 341 species of trees[74] in a 2  
257 ha plot of the Centre for Tropical Forest Science). Moreover, we extensively sampled the

258 insect diversity in the reserve by placing multiple Malaise traps in primary, maturing  
259 secondary, and old secondary forests. Similarly, we expected the insect diversity of  
260 Singapore's largest swamp forest (Nee Soon) to greatly exceed the number of species found  
261 in the mangrove sites because the swamp forest is also known for its high species richness  
262 (e.g., 1,150 species of vascular plant species[75]).

263 A guild-level analysis reveals how mangroves maintain high species diversity. They  
264 are impoverished with regard to phytophagous and fungivorous species, but are home to a  
265 disproportionately large number of predatory species (Fig. 4) whose larvae develop in  
266 sediments (Empidoidea and Tabanidae). This suggests that the high insect diversity in  
267 different tropical habitats may be achieved by having larger proportions of species  
268 developing in the biologically most productive microhabitats – plants and fungi for many  
269 forest habitats and the rich and productive mud flats for mangroves.

270 In addition to finding high alpha-diversity in mangroves, we also document that the  
271 mangrove insect communities are very distinct. This conclusion is supported by a multitude  
272 of analyses (NMDS, ANOSIM & SIMPER). It is furthermore insensitive to the removal of rare  
273 species (Fig. 2) and driven by high species turnover rather than nestedness (see Table 1C).  
274 This stratification by habitat is still evident even when the two dominant insect orders in  
275 Malaise trap samples (Diptera and Hymenoptera) are removed (Fig. 2). Comparatively high  
276 overlap is only observed between mangroves and coastal forests (860 shared species)  
277 which is likely due to close proximity of the habitats on Pulau Ubin (Fig. S1) where back  
278 mangroves and coastal forests are contiguous. The uniqueness of the mangrove insect  
279 community is likely due to the unusual environmental conditions characterized by extreme  
280 daily fluctuations in salinity, temperature, and inundation. These extreme conditions likely  
281 require physiological and behavioural adaptations that encourage the emergence of an  
282 evolutionarily distinct fauna. What is surprising, however, is that we find no evidence for an  
283 adaptive radiation of particular clades. Instead, a large number of independent colonization  
284 events seems more likely given that the mangrove species usually belong to genera that are



285 also known from other habitats (e.g., Dolichopodidae). This challenges the view that high  
286 salinity is a potent colonization barrier for invertebrates[67,68].

287 Mangrove regeneration is pursued in many countries, with mixed success in restoring  
288 the original plant diversity[76,77], but it remains poorly understood whether the regenerated  
289 mangroves harbour the original arthropod biodiversity. Our preliminary data based on 311  
290 Malaise trap samples from one regenerated site suggests that this may not be the case. The  
291 regenerated mangrove (SMN) was replanted with a monoculture of *Rhizophora stylosa*[71]  
292 which replaced old-growth mangroves that had been cleared during reclamation work  
293 (1994–1999[51]). The restored site (SMN) has markedly lower insect species richness than  
294 all other mangrove sites, including a neighbouring old-growth mangrove (SMO; Fig. 1). This  
295 highlights once more the need for holistic habitat assessments that goes beyond plants and  
296 vertebrates[78].

297 Mangrove insect communities are not only rich and distinct in Singapore. Within Asia,  
298 we reveal a 92% species turnover between Singapore and Hong Kong (2,500 km north; Fig.  
299 S1) for taxa representing different guilds (Dolichopodidae–predators: 483 species,  
300 Mycetophilidae–fungivores: 67 species, Phoridae–mostly saprophagous: 591 species).  
301 While climatic differences could be advanced as a potential explanation, comparisons with  
302 the mangroves in the geographically close and tropical Borneo (Brunei) confirm a high  
303 species turnover of 85% (see also Grootaert 2019[79]). Further evidence for high regional  
304 species turnover in mangroves emerges when the dolichopodid fauna of Singapore’s and  
305 Brunei’s mangroves are compared with the fauna of Southern Thailand (coasts of South  
306 China and Andaman seas). Only 34 and 10 of the 74 known Thai species are shared with  
307 Singapore and Brunei respectively; These data suggest that a significant proportion of the  
308 global insect diversity may reside in mangroves. Based on the data from Singapore, it  
309 appears that much of the diversity may still be intact, given that we find no evidence that the  
310 insect diversity in Singapore’s mangroves is depressed relative to what is found in the more  
311 pristine sites in Brunei or Hong Kong. This suggests that the loss of species diversity for

312 small, flying insects in Singapore may not have been as dramatic as what has been  
313 documented for vertebrates and larger invertebrates[48,80,81].

#### 314 *Discovering a new insect hotspot with NGS barcoding*

315 Global insect declines have recently received much attention by the scientific  
316 community[2] and public[82]. Obtaining relevant data is very difficult since quantifying insect  
317 diversity using conventional techniques is slow and expensive. This is because too many  
318 specimens have to be sorted into too many species before a holistic habitat assessment can  
319 be carried out[83]. In our study, this problem is overcome via sorting based on NGS  
320 barcodes which differ from traditional barcodes by costing only a fraction of barcodes  
321 obtained with Sanger sequencing. Based on previous tests, we find that species delimited  
322 with NGS barcodes have >90% congruence with species-level units delimited with  
323 morphological data[56,57,84,85]. This suggests that large-scale species discovery with NGS  
324 barcoding yields sufficiently accurate information on species abundance and distribution for  
325 habitat assessments[55,56]; i.e., NGS barcodes can be used for quickly revealing hidden  
326 hotspots of insect diversity in countries with high diversity and limited funding. We estimate  
327 that the ~140,000 specimens in our study could today be sequenced for <USD25,000 using  
328 350 manpower days whereas a similar study based on morphology would require >150  
329 manpower years[86]; i.e. some of the traditional obstacles to understanding insect  
330 biodiversity caused by the taxonomic impediment are finally disappearing.

#### 331 *Concluding remarks*

332 We here document that the insect fauna inhabiting mangroves is not only rich, but  
333 also distinct when compared to many other tropical forest habitats. The discovery of such an  
334 unexpectedly rich and distinct insect community highlights how little we know about insect  
335 diversity. We predict that advances in sequencing technology will facilitate the discovery of  
336 numerous additional insect diversity hotspots in tropical and temperate habitats. Mangroves  
337 will likely be only one of many future additions to the growing list of habitats that have only

338 recently been recognized as containing a large proportion of the global biodiversity (e.g., dry  
339 forests[87,88], forest savannahs[89,90]). Our study highlights that accelerating species  
340 discovery is a pressing task given that many of these habitats are disappearing at a much  
341 faster rate than tropical rainforests.

342

## 343 **Methods**

### 344 *Sampling site, sample collection, and processing*

345 Singapore has a large number of tropical habitat types that are all within 40 km of  
346 each other without being separated by major physical barriers. This allowed us to sample  
347 rainforests (from early secondary to mature secondary forest), urban-edge forests,  
348 mangroves, swamp forests, freshwater swamps and dry coastal forests. The freshwater  
349 swamp habitat differs from swamp forests by largely lacking tree-cover, while the dry coastal  
350 forests are distinct from the mangroves by lacking typical mangrove tree species. Note that  
351 the habitats had experienced similar levels of habitat degradation or loss due to urbanization  
352 (>95% loss of original vegetation cover[48]; ca. 90% loss for rainforests[49]; ca. 93% loss of  
353 swamp forest[50]; 91% loss for mangroves[51]). We sampled these habitat types using 107  
354 trapping sites (Fig. S1). The mangrove sites were located primarily along the North-western  
355 and Southern coasts of the mainland, as well as on offshore islands in the south and  
356 northeast. The major mangrove sites were on Pulau Ubin (PU), Sungei Buloh (SB) and  
357 Pulau Semakau (SM), the last of which is represented by an old-growth (SMO) and a newly  
358 regenerated mangrove fragment (SMN). The swamp forest site (Nee Soon) was Singapore's  
359 largest remaining freshwater swamp remnant which is known for a rich insect fauna[91],  
360 overall high species richness, and level of endemism[92,93]. Bukit Timah Nature Reserve  
361 was selected as the tropical rainforest site given its high species diversity and protected  
362 status[72]. This reserve consists of forests in various stages of succession and hence we  
363 sampled different forest types with three sites each being in primary forest, old secondary

364 forest, and maturing secondary forest. The “urban secondary forest” sites were located along  
365 a disturbance gradient ranging from the campus of the National University of Singapore  
366 (NUS) through several urban parks and forest edges in Central and South Singapore. The  
367 freshwater swamp site is located primarily in Kranji, a freshwater marsh at the flooded edge  
368 of a reservoir. The “coastal forest” sites were dry secondary forests adjacent to the coast at  
369 Labrador Park and Pulau Ubin, which are also close to urban settlements.

370 All specimens were collected between 2012–2019 (Table S1) using Malaise traps.  
371 These traps are widely used for insect surveys because they are effective sampling tools for  
372 flying insects and allow for standardized, long-term sampling. Note that the use of Malaise  
373 traps in our study was appropriate because the canopy height was comparable for most  
374 habitats given that we compared mature mangroves (PU, SB and SMO) with a wet swamp  
375 forest site, and different kinds of secondary forests (pers. obs.). Only the canopy height of  
376 some sites in Bukit Timah Nature Reserve (BTNR) was higher, but for BTNR we also  
377 included secondary forests and several traps were placed on steep slopes that would be  
378 able to sample canopy-active fauna from a lower elevation. With regard to the habitat  
379 patches, the fragments were larger for the rainforest and swamp forest than for any of the  
380 mangrove sites (tropical rainforest: 1.64 km<sup>2</sup>; swamp forest: 5 km<sup>2</sup>, mangrove forest  
381 fragments: 0.904 km<sup>2</sup> [PU], 1.168 km<sup>2</sup> [SB], 0.174 km<sup>2</sup> [SM][51]). Malaise traps in the  
382 mangroves were set up in the intertidal zone. Each Malaise trap sample consisted of one-  
383 week’s worth of insects preserved in molecular grade ethanol. After an ethanol change, the  
384 specimens were sorted to order/family level by para-taxonomists, and specimens from 16  
385 arthropod orders were extracted for barcoding (Fig. S2): Araneae, Blattodea, Coleoptera,  
386 Diptera, Hemiptera, Hymenoptera, Lepidoptera, Mantodea, Megaloptera, Neuroptera,  
387 Orthoptera, Phasmida, Plecoptera, Psocodea, Strepsiptera and Trichoptera. Diptera and  
388 Hymenoptera were the dominant orders in the Malaise traps (Fig. S2: >75% of specimens)  
389 and sorted further to family and genus-level where possible (Table S2), either based on  
390 morphology or based on DNA barcodes identified using the Global Biodiversity Information

391 Facility (GBIF: [www.gbif.org](http://www.gbif.org)) or the Barcode of Life Data (BOLD: [www.boldsystems.org](http://www.boldsystems.org))  
392 databases. Only matches above 95% and 97% similarity were considered sufficiently precise  
393 for family- and genus-level matches respectively. The mangrove specimens from Hong Kong  
394 were collected by 24 Malaise traps installed between October 2017 to October 2018, while  
395 those from Brunei were collected by six Malaise traps from July to November 2014. Note  
396 that the mangrove forests in Brunei were less affected by urbanization than those in  
397 Singapore. The dolichopodid specimens from Thailand were obtained by different  
398 techniques including sweep-netting from 42 mangrove sites over a period of 15 months from  
399 Mar 2014 – Dec 2015.

#### 400 *Putative species sorting with NGS barcoding*

401 NGS barcoding combines the advantages of cost-effective sequencing with Illumina  
402 with the approximate species-level resolution provided by DNA barcodes. The molecular  
403 procedures can be learned in hours and several hundred specimens can be processed per  
404 person and day. The overall barcode costs are now <10 cents per specimen if Illumina  
405 Novaseq is used for sequencing (2 cents/barcode based on USD 6,900 per 250-bp PE flow  
406 cell yielding 800 million reads: <https://research.ncsu.edu/gsl/pricing>). We used NGS  
407 barcoding to amplify and sequence a 313-bp fragment of the cytochrome oxidase I gene  
408 (*cox1*) using a protocol described in Meier et al.[55]. Direct-PCR[94] was conducted for  
409 specimens collected early in the study; during this phase, we used 1-2 legs of the specimen  
410 as template for obtaining the amplicon with the primer pair mICO1intF: 5'-  
411 GGWACWGGWTGAACWGTWTAYCCYCC-3'[95] and jgHCO2198: 5'-  
412 TANACYTCNGGRTGNCCRAARAAYCA-3'[96]. For samples processed later, the whole  
413 specimen was immersed in Lucigen QuickExtract solution or HotSHOT buffer[97] and gDNA  
414 extraction was conducted non-destructively. The gDNA extract was then used as a PCR  
415 template with the afore-mentioned reagents and protocol. The primers used were labelled  
416 with 9-bp long barcodes that differed by at least three base pairs. Every specimen in each  
417 sequencing library was assigned a unique combination of labelled forward and reverse

418 primers, which allowed the Illumina reads to be binned according to specimen. A negative  
419 control was prepared and sequenced for each 96-well PCR plate. Amplification success  
420 rates for each plate were assessed via gel electrophoresis for eight random wells per plate.

421 The amplicons were pooled at equal volumes within each plate and later pooled  
422 across plates. Equimolarity was estimated by the presence and intensity of bands on gels.  
423 The pooled samples were cleaned with Bionline SureClean Plus and/or via gel cuts before  
424 outsourcing library preparation to AITbiotech using TruSeq Nano DNA Library Preparation  
425 Kits (Illumina) or the Genome Institute of Singapore (GIS) using NEBNext DNA Library  
426 Preparation Kits (NEB). Paired-end sequencing was performed on Illumina Miseq (2x300-bp  
427 or 2x250-bp) or HiSeq 2500 platforms (2x250-bp) over multiple runs, thereby allowing  
428 troubleshooting and re-sequencing for specimens which initially failed to yield a sufficiently  
429 large number of reads. Some of the specimens were also sequenced on the MinION (Oxford  
430 Nanopore) platform using primers with a slightly longer tags (13-bp) and following the  
431 protocol described in Srivathsan et al.[98,57]. Raw Illumina reads were processed with the  
432 bioinformatics pipeline and quality-control filters described in Meier et al.[55]. A BLAST  
433 search to GenBank's nucleotide (nt) database was also conducted to identify and discard  
434 contaminants by parsing the BLAST output through *readsidentifier*[99] and removing  
435 barcodes with incorrect matches at >97% identity.

436 To obtain putative species units, the *cox1* barcodes were clustered over a range of  
437 uncorrected p-distance thresholds (2–4%) typically used for species delimitation in the  
438 literature[100]. The clustering was performed with a python script that implements the  
439 objective clustering algorithm of Meier et al. 2006[59] and allows for large scale processing.  
440 USEARCH[60] (*cluster\_fast*) was used to confirm the results by setting *-id* at 0.96, 0.97 and  
441 0.98. To gauge how many of our species/specimens matched barcodes in public databases,  
442 we used the "Sequence ID" search of the Global Biodiversity Information Facility (GBIF). We  
443 then determined the number of matches with identity scores <97. We then counted the  
444 number of matches to barcodes with species-level identifications.

445 *Diversity analyses*

446 For analysis of species richness and turnover, we excluded 11 trapping sites which  
447 had <100 specimens per site in order to prevent poor sampling from inflating site  
448 distinctness. To assess the species richness of the six major habitat types, samples were  
449 rarefied with the *iNEXT*[101] R package (R Development Core Team) using 1,000 bootstrap  
450 replicates in order to account for unequal sampling completeness. The rarefaction was  
451 performed by coverage[61] in the main analysis (Fig. 1) and by specimen count in the  
452 supplementary (Fig. S3). Site comparisons were carried out by comparing species diversity  
453 post-rarefaction to the lowest coverage/smallest number of specimens. The habitat type  
454 “mangrove” was treated both as a single habitat as well as separate sites (PU, SB, SMN,  
455 SMO, others) in separate analyses.

456 In order to study species turnover, we determined the distinctness of the  
457 communities across habitats using non-metric multidimensional scaling (NMDS) plots that  
458 were prepared with PRIMER v7[102] using Bray-Curtis dissimilarity. Plots were generated  
459 for each habitat type and the different mangrove sites; Bray-Curtis was chosen because it is  
460 a preferred choice for datasets that include abundance information. The dataset was split  
461 into three groups: the dominant orders (Diptera and Hymenoptera) and all others combined,  
462 in order to test if the results were driven by the dominant orders. Analysis of similarities  
463 (ANOSIM) and similarity percentages (SIMPER) were performed in PRIMER under default  
464 parameters in order to obtain ANOSIM p-values and R-statistics for both the entire dataset  
465 and the pairwise comparisons between habitat types. The SIMPER values were calculated  
466 for within and between-habitat types. The ANOSIM p-values can be used to assess  
467 significant differences while the R-statistic allows for determining the degree of similarity,  
468 with values closer to 1 indicating greater distinctness. We also used the *betapart*[103] R  
469 package to examine if the observed dissimilarity (Bray-Curtis) was due to species turnover  
470 or nestedness. The *beta.multi.abund* and *beta.pair.abund* functions were used to split the  
471 global and pairwise dissimilarity scores into turnover and nestedness components. Lastly,

472 the robustness of the results was tested by removing singleton, doubleton and rare species  
473 (<5 and <10 individuals) from the datasets. The pruned datasets were subjected to the same  
474 analyses as the full dataset. For the guild-specific datasets, traps with fewer than three  
475 species were excluded in the species turnover analyses because large distances driven by  
476 undersampling can obscure signal.

477 To examine species turnover across larger geographic scales, dolichopodid, phorid,  
478 and mycetophilid specimens from Singapore were compared with those from Hong Kong  
479 (Dolichopodidae: 2,601; Phoridae: 562, Mycetophilidae: 186), and Brunei (Dolichopodidae:  
480 2,800; Phoridae: 272), and data for the dolichopodids of Southern Thai mangroves (942  
481 specimens). Since Singapore was more extensively sampled, the Singaporean dataset was  
482 randomly subsampled (10 iterations in Microsoft Excel with the RAND() function) to the  
483 number of specimens available for the other two countries (Table S3). The species diversity  
484 after rarefaction was then compared (with 95% confidence intervals for the rarefied data).

#### 485 *Ecological guild and plant diversity analyses*

486 For the guild-level analysis, we focused primarily on the two dominant orders Diptera  
487 and Hymenoptera, which comprised of species from a large variety of ecological guilds. As  
488 splitting the dataset into smaller guild-level partitions would create low-abundance subsets,  
489 we excluded trapping sites that were sampled for <6 months, resulting in a dataset  
490 consisting of 62,066 specimens from 9 rainforest, 4 swamp forest, 4 urban forest, and 32  
491 mangrove sites (Fig. S1). In order to test for an overall correlation between plant and insect  
492 diversity, we obtained data for the plant diversity in the respective sites from checklists and  
493 survey plots (Table S4). In order to further examine the correlation between plant and insect  
494 diversity across multiple ecological guilds, we assigned the identified Diptera and  
495 Hymenoptera families and genera non-exclusively to ecological guilds (phytophages,  
496 pollinators, fungivores, parasitoids, predators, haematophages and detritivores) based on  
497 known adult and larval natural history traits for the group (Table S2). Taxa with different adult  
498 and larval natural histories are placed in both guilds. Taxa lacking sufficient information or



499 with highly variable life-history strategies were assigned to the “Others/Unknown” category  
500 and excluded from analysis.

501           Barcodes from each guild were separately aligned and clustered at 3% p-distance.  
502 These subsets were used for further analysis by randomly subsampling (10 iterations in  
503 Microsoft Excel with the RAND() function) the same number of specimens at the site with the  
504 smallest number of specimens (urban forest site, 2,543 specimens). For taxa that have  
505 adults and immatures with different natural histories (i.e., belong to two distinct ecological  
506 guilds), the species counts were halved and placed into both guilds when calculating rarefied  
507 species abundance and richness. Species turnover for the guild-specific subsets were  
508 analysed with PRIMER to generate NMDS plots, as well as ANOSIM and SIMPER values.  
509 The rarefied species richness values were also used for a multivariate model analysis. An  
510 ANCOVA model was constructed in R[104] with the *lm* function: *insectdiv ~ site \* habitat \*  
511 guild \* plantdiv*, with *insectdiv* representing rarefied insect alpha-diversity and *plantdiv*  
512 representing plant species counts. The “site” factor was excluded due to collinearity and the  
513 model was refined via stepwise removal of factors starting with the most complex (interaction  
514 terms) and least significant ones. At each stage, the *anova* function was used to assess loss  
515 of informational content and the final model was derived when the reported p-value was  
516 significant ( $p < 0.05$ ). The model’s residuals were examined to ensure the data were normal.  
517 Subsequently, the *Anova* function from the *car* package[105] was used to obtain type-II test  
518 statistics. Finally, single-variable linear regression was performed in R with the *lm* function:  
519 *insectdiv ~ plantdiv* for each guild separately to obtain significance, multiple R-squared and  
520 Spearman’s rho values.

521

## 522 **References**

- 523 1. Dirzo R, Young HS, Galetti M, Ceballos G, Isaac NJB, Collen B. Defaunation in the  
524 Anthropocene. *Science*. 2014;345: 401–406. doi:10.1126/science.1251817

- 525 2. Hallmann CA, Sorg M, Jongejans E, Siepel H, Hofland N, Schwan H, et al. More than 75 percent  
526 decline over 27 years in total flying insect biomass in protected areas. Lamb EG, editor. PLoS  
527 ONE. 2017;12: e0185809. doi:10.1371/journal.pone.0185809
- 528 3. Lister BC, Garcia A. Climate-driven declines in arthropod abundance restructure a rainforest  
529 food web. Proc Natl Acad Sci USA. 2018;115: E10397–E10406. doi:10.1073/pnas.1722477115
- 530 4. Díaz S, Settele J, Brondízio E, Ngo HT, Guèze M, Agard J, et al. Summary for policymakers of  
531 the global assessment report on biodiversity and ecosystem services of the  
532 Intergovernmental Science-Policy Platform on Biodiversity and Ecosystem Services. IPBES.  
533 2019; 45.
- 534 5. Basset Y, Lamarre GPA. Toward a world that values insects. Science. 2019;364: 1230–1231.  
535 doi:10.1126/science.aaw7071
- 536 6. Cardoso P, Branco VV, Chichorro F, Fukushima CS, Macías-Hernández N. Can we really predict  
537 a catastrophic worldwide decline of entomofauna and its drivers? Global Ecology and  
538 Conservation. 2019;20: e00621. doi:10.1016/j.gecco.2019.e00621
- 539 7. Komonen A, Halme P, Kotiaho JS. Alarmist by bad design: Strongly popularized  
540 unsubstantiated claims undermine credibility of conservation science. ReEco. 2019;4: 17–19.  
541 doi:10.3897/rethinkingecology.4.34440
- 542 8. Sánchez-Bayo F, Wyckhuys KAG. Worldwide decline of the entomofauna: A review of its  
543 drivers. Biological Conservation. 2019;232: 8–27. doi:10.1016/j.biocon.2019.01.020
- 544 9. Simmons BI, Balmford A, Bladon AJ, Christie AP, De Palma A, Dicks LV, et al. Worldwide insect  
545 declines: An important message, but interpret with caution. Ecol Evol. 2019;9: 3678–3680.  
546 doi:10.1002/ece3.5153
- 547 10. Thomas CD, Jones TH, Hartley SE. “Insectageddon”: A call for more robust data and rigorous  
548 analyses. Glob Change Biol. 2019;25: 1891–1892. doi:10.1111/gcb.14608
- 549 11. Coddington JA, Agnarsson I, Miller JA, Kuntner M, Hormiga G. Undersampling bias: the null  
550 hypothesis for singleton species in tropical arthropod surveys. Journal of Animal Ecology.  
551 2009;78: 573–584. doi:10.1111/j.1365-2656.2009.01525.x
- 552 12. Stork NE. How many species of insects and other terrestrial arthropods are there on Earth?  
553 Annu Rev Entomol. 2018;63: 31–45. doi:10.1146/annurev-ento-020117-043348
- 554 13. Basset Y, Cizek L, Cuénoud P, Didham RK, Novotny V, Ødegaard F, et al. Arthropod  
555 distribution in a tropical rainforest: Tackling a four dimensional puzzle. Guralnick R, editor.  
556 PLoS ONE. 2015;10: e0144110. doi:10.1371/journal.pone.0144110
- 557 14. Kishimoto-Yamada K, Itioka T. How much have we learned about seasonality in tropical insect  
558 abundance since Wolda (1988)? Entomological Science. 2015;18: 407–419.  
559 doi:10.1111/ens.12134
- 560 15. van Klink R, Bowler DE, Gongalsky KB, Swengel AB, Gentile A, Chase JM. Meta-analysis reveals  
561 declines in terrestrial but increases in freshwater insect abundances. Science. 2020;368: 417–  
562 420.

- 563 16. Seastedt TR, Crossley DA. The Influence of Arthropods on Ecosystems. *BioScience*. 1984;34:  
564 157–161. doi:10.2307/1309750
- 565 17. Perfecto I, Vandermeer J, Hanson P, Carti an V. Arthropod biodiversity loss and the trans-  
566 formation of a tropical agro-ecosystem. *Biodiversity and Conservation*. 1997;6: 935–945.
- 567 18. Whiles MR, Charlton RE. The ecological significance of tallgrass prairie arthropods. *Annu Rev*  
568 *Entomol*. 2006;51: 387–412. doi:10.1146/annurev.ento.51.110104.151136
- 569 19. Ewers RM, Boyle MJW, Gleave RA, Plowman NS, Benedick S, Bernard H, et al. Logging cuts the  
570 functional importance of invertebrates in tropical rainforest. *Nat Commun*. 2015;6: 6836.  
571 doi:10.1038/ncomms7836
- 572 20. Bar-On YM, Phillips R, Milo R. The biomass distribution on Earth. *Proc Natl Acad Sci USA*.  
573 2018;115: 6506–6511. doi:10.1073/pnas.1711842115
- 574 21. Barlow J, Fran a F, Gardner TA, Hicks CC, Lennox GD, Berenguer E, et al. The future of  
575 hyperdiverse tropical ecosystems. *Nature*. 2018;559: 517–526. doi:10.1038/s41586-018-  
576 0301-1
- 577 22. Novotny V, Basset Y. Rare species in communities of tropical insect herbivores: pondering the  
578 mystery of singletons. *Oikos*. 2000;89: 564–572. doi:10.1034/j.1600-0706.2000.890316.x
- 579 23. Novotny V, Drozd P, Miller SE, Kulfan M, Janda M, Basset Y, et al. Why are there so many  
580 species of herbivorous insects in tropical rainforests? *Science*. 2006;313: 1115–1118.  
581 doi:10.1126/science.1129237
- 582 24. Basset Y, Cizek L, Cuenoud P, Didham RK, Guilhaumon F, Missa O, et al. Arthropod Diversity in  
583 a Tropical Forest. *Science*. 2012;338: 1481–1484. doi:10.1126/science.1226727
- 584 25. Duke NC, Meynecke J-O, Dittmann S, Ellison AM, Anger K, Berger U, et al. A world without  
585 mangroves? *Science*. 2007;317: 41b–42b. doi:10.1126/science.317.5834.41b
- 586 26. Valiela I, Bowen JL, York JK. Mangrove forests: One of the world’s threatened major tropical  
587 environments. *BioScience*. 2001;51: 807. doi:10.1641/0006-  
588 3568(2001)051[0807:MFOOTW]2.0.CO;2
- 589 27. Gilman EL, Ellison J, Duke NC, Field C. Threats to mangroves from climate change and  
590 adaptation options: A review. *Aquatic Botany*. 2008;89: 237–250.  
591 doi:10.1016/j.aquabot.2007.12.009
- 592 28. Spencer T, Schuerch M, Nicholls RJ, Hinkel J, Lincke D, Vafeidis AT, et al. Global coastal  
593 wetland change under sea-level rise and related stresses: The DIVA Wetland Change Model.  
594 *Global and Planetary Change*. 2016;139: 15–30. doi:10.1016/j.gloplacha.2015.12.018
- 595 29. Friess DA, Richards DR, Phang VXH. Mangrove forests store high densities of carbon across  
596 the tropical urban landscape of Singapore. *Urban Ecosyst*. 2016;19: 795–810.  
597 doi:10.1007/s11252-015-0511-3
- 598 30. Alongi DM. Mangrove forests: Resilience, protection from tsunamis, and responses to global  
599 climate change. *Estuarine, Coastal and Shelf Science*. 2008;76: 1–13.  
600 doi:10.1016/j.ecss.2007.08.024

- 601 31. Spalding MD, Ruffo S, Lacambra C, Meliane I, Hale LZ, Shepard CC, et al. The role of  
602 ecosystems in coastal protection: Adapting to climate change and coastal hazards. *Ocean &*  
603 *Coastal Management*. 2014;90: 50–57. doi:10.1016/j.ocecoaman.2013.09.007
- 604 32. Zavalloni M, Groeneveld RA, van Zwieten PAM. The role of spatial information in the  
605 preservation of the shrimp nursery function of mangroves: A spatially explicit bio-economic  
606 model for the assessment of land use trade-offs. *Journal of Environmental Management*.  
607 2014;143: 17–25. doi:10.1016/j.jenvman.2014.04.020
- 608 33. Nagelkerken I, Blaber SJM, Bouillon S, Green P, Haywood M, Kirton LG, et al. The habitat  
609 function of mangroves for terrestrial and marine fauna: A review. *Aquatic Botany*. 2008;89:  
610 155–185. doi:10.1016/j.aquabot.2007.12.007
- 611 34. Yates KK, Rogers CS, Herlan JJ, Brooks GR, Smiley NA, Larson RA. Diverse coral communities in  
612 mangrove habitats suggest a novel refuge from climate change. *Biogeosciences*. 2014;11:  
613 4321–4337. doi:10.5194/bg-11-4321-2014
- 614 35. Zhang K, Lin S, Ji Y, Yang C, Wang X, Yang C, et al. Plant diversity accurately predicts insect  
615 diversity in two tropical landscapes. *Mol Ecol*. 2016;25: 4407–4419. doi:10.1111/mec.13770
- 616 36. Bagchi R, Gallery RE, Gripenberg S, Gurr SJ, Narayan L, Addis CE, et al. Pathogens and insect  
617 herbivores drive rainforest plant diversity and composition. *Nature*. 2014;506: 85–88.  
618 doi:10.1038/nature12911
- 619 37. Becerra JX. On the factors that promote the diversity of herbivorous insects and plants in  
620 tropical forests. *Proc Natl Acad Sci USA*. 2015;112: 6098–6103. doi:10.1073/pnas.1418643112
- 621 38. Moreira X, Abdala-Roberts L, Rasmann S, Castagneyrol B, Mooney KA. Plant diversity effects  
622 on insect herbivores and their natural enemies: current thinking, recent findings, and future  
623 directions. *Current Opinion in Insect Science*. 2016;14: 1–7. doi:10.1016/j.cois.2015.10.003
- 624 39. Lewinsohn TM, Novotny V, Basset Y. Insects on Plants: Diversity of Herbivore Assemblages  
625 Revisited. *Annu Rev Ecol Evol Syst*. 2005;36: 597–620.  
626 doi:10.1146/annurev.ecolsys.36.091704.175520
- 627 40. Batista-da-Silva JA. Effect of lunar phases, tides, and wind speed on the abundance of Diptera  
628 Calliphoridae in a mangrove swamp. *Neotrop Entomol*. 2014;43: 48–52. doi:10.1007/s13744-  
629 013-0181-x
- 630 41. Chowdhury S. Butterflies of Sundarban Biosphere Reserve, West Bengal, eastern India: a  
631 preliminary survey of their taxonomic diversity, ecology and their conservation. *J Threat Taxa*.  
632 2014;6: 6082–6092. doi:10.11609/JoTT.o3787.6082-92
- 633 42. Rohde C, Silva DMIO, Oliveira GF, Monteiro LS, Montes MA, Garcia ACL. Richness and  
634 abundance of the cardini group of *Drosophila* (Diptera, Drosophilidae) in the Caatinga and  
635 Atlantic Forest biomes in northeastern Brazil. *An Acad Bras Ciênc*. 2014;86: 1711–1718.  
636 doi:10.1590/0001-3765201420130314
- 637 43. Hazra AK, Dey MK, Mandal GP. Diversity and distribution of arthropod fauna in relation to  
638 mangrove vegetation on a newly emerged island on the river Hooghly, West Bengal. *Rec Zool*  
639 *Surv India*. 2005;104: 99–102.

- 640 44. Adeduntan SA, Olusola JA. Diversity and abundance of arthropods and tree species as  
641 influenced by different forest vegetation types in Ondo State, Nigeria. *International Journal of*  
642 *Ecosystem*. 2013;3: 19–23. doi:10.5923/j.ije.20130303.01
- 643 45. García-Gómez A, Castaño-Meneses G, Vázquez-González MM, Palacios-Vargas JG. Mesofaunal  
644 arthropod diversity in shrub mangrove litter of Cozumel Island, Quintana Roo, México.  
645 *Applied Soil Ecology*. 2014;83: 44–50. doi:10.1016/j.apsoil.2014.03.013
- 646 46. D’Cunha P, Nair VM. Diversity and distribution of ant fauna in Hejamadi Kodi sandspit, Udipi  
647 district, Karnataka, India. *Halteres*. 2013;4: 33–47.
- 648 47. Balakrishnan S, Srinivasan M, Mohanraj J. Diversity of some insect fauna in different coastal  
649 habitats of Tamil Nadu, southeast coast of India. *Journal of Asia-Pacific Biodiversity*. 2014;7:  
650 408–414. doi:10.1016/j.japb.2014.10.010
- 651 48. Brook BW, Sodhi NS, Ng PKL. Catastrophic extinctions follow deforestation in Singapore.  
652 *Nature*. 2003;424: 420–423. doi:10.1038/nature01795
- 653 49. Corlett RT. Plant succession on degraded land in Singapore. *Journal of Tropical Forest Science*.  
654 1991;4: 151–161.
- 655 50. Davison GWH, Cai Y, Li TJ, Lim WH. Integrated research, conservation and management of  
656 Nee Soon freshwater swamp forest, Singapore: hydrology and biodiversity. *GBS 70(Suppl1)*  
657 *Nee Soon*. 2018;70: 1–7. doi:10.26492/gbs70(suppl.1).2018-01
- 658 51. Yee ATK, Ang WF, Teo S, Liew SC, Tan HTW. The present extent of mangrove forests in  
659 Singapore. *Nature in Singapore*. 2010;3: 139–145.
- 660 52. Colwell RK, Coddington J. Estimating terrestrial biodiversity through extrapolation. *Phil Trans*  
661 *R Soc Lond B*. 1994;345: 101–118. doi:10.1098/rstb.1994.0091
- 662 53. Longino JT, Coddington J, Colwell RK. The ant fauna of a tropical rain forest: estimating  
663 species richness three different ways. *Ecology*. 2002;83: 689–702. doi:10.1890/0012-  
664 9658(2002)083[0689:TAFOAT]2.0.CO;2
- 665 54. Scharff N, Coddington JA, Griswold CE, Hormiga G, Bjørn P de P. When to quit? estimating  
666 spider species richness in a northern european deciduous forest. *Journal of Arachnology*.  
667 2003;31: 246–273. doi:10.1636/0161-8202(2003)031[0246:WTQESS]2.0.CO;2
- 668 55. Meier R, Wong W, Srivathsan A, Foo M. \$1 DNA barcodes for reconstructing complex  
669 phenomes and finding rare species in specimen-rich samples. *Cladistics*. 2016;32: 100–110.  
670 doi:10.1111/cla.12115
- 671 56. Wang WY, Srivathsan A, Foo M, Yamane SK, Meier R. Sorting specimen-rich invertebrate  
672 samples with cost-effective NGS barcodes: Validating a reverse workflow for specimen  
673 processing. *Mol Ecol Resour*. 2018;18: 490–501. doi:10.1111/1755-0998.12751
- 674 57. Srivathsan A, Hartop E, Puniemoorthy J, Lee WT, Kutty SN, Kurina O, et al. Rapid, large-scale  
675 species discovery in hyperdiverse taxa using 1D MinION sequencing. *Evolutionary Biology*;  
676 2019 Apr. doi:10.1101/622365

- 677 58. Yeo D, Srivathsan A, Meier R. Longer is not always better: Optimizing barcode length for  
678 large-scale species discovery and identification. *Evolutionary Biology*; 2019 Mar.  
679 doi:10.1101/594952
- 680 59. Meier R, Shiyang K, Vaidya G, Ng PKL. DNA barcoding and taxonomy in Diptera: A tale of high  
681 intraspecific variability and low identification success. Hedin M, editor. *Systematic Biology*.  
682 2006;55: 715–728. doi:10.1080/10635150600969864
- 683 60. Edgar RC. Search and clustering orders of magnitude faster than BLAST. *Bioinformatics*.  
684 2010;26: 2460–2461. doi:10.1093/bioinformatics/btq461
- 685 61. Chao A, Jost L. Coverage-based rarefaction and extrapolation: standardizing samples by  
686 completeness rather than size. *Ecology*. 2012;93: 2533–2547. doi:10.1890/11-1952.1
- 687 62. Benjamin DJ, Berger JO, Johannesson M, Nosek BA, Wagenmakers E-J, Berk R, et al. Redefine  
688 statistical significance. *Nat Hum Behav*. 2018;2: 6–10. doi:10.1038/s41562-017-0189-z
- 689 63. Ho BC, Lua HK, Ibrahim B, Yeo RSW, Athen P, Leong PKF, et al. The plant diversity in Bukit  
690 Timah Nature Reserve, Singapore. *GBS*. 2019;71: 41–144. doi:10.26492/gbs71(suppl.1).2019-  
691 04
- 692 64. Chong KY, Lim RCJ, Loh JW, Neo L, Seah WW, Tan SY, et al. Rediscoveries, new records, and  
693 the floristic value of the Nee Soon freshwater swamp forest, Singapore. *GBS 70(Suppl1) Nee*  
694 *Soon*. 2018;70: 49–69. doi:10.26492/gbs70(suppl.1).2018-04
- 695 65. Brown BV. Malaise Trap Catches and the Crisis in Neotropical Dipterology. *American*  
696 *Entomologist*. 2005;51: 180–183. doi:10.1093/ae/51.3.180
- 697 66. Hebert PDN, Ratnasingham S, Zakharov EV, Telfer AC, Levesque-Beaudin V, Milton MA, et al.  
698 Counting animal species with DNA barcodes: Canadian insects. *Phil Trans R Soc B*. 2016;371:  
699 20150333. doi:10.1098/rstb.2015.0333
- 700 67. Berezina NA. Tolerance of Freshwater Invertebrates to Changes in Water Salinity. *Russian*  
701 *Journal of Ecology*. 2003;34: 261–266.
- 702 68. Silberbush A, Blaustein L, Margalith Y. Influence of Salinity Concentration on Aquatic Insect  
703 Community Structure: A Mesocosm Experiment in the Dead Sea Basin Region. *Hydrobiologia*.  
704 2005;548: 1–10. doi:10.1007/s10750-004-8336-8
- 705 69. Lee S, Leong' SAP, Ibrahim' A, Gwee' A-T. A Botanical Survey of Chek Jawa, Pulau Ubin,  
706 Singapore. *Gardens' Bulletin Singapore*. 2003;55: 271–307.
- 707 70. Tan HTW, Choong MF, Chua KS, Loo AHB, bin Haji Ahmad HS, Seah EEL, et al. A botanical  
708 survey of Sungei Buloh Nature Park, Singapore. *The Gardens' Bulletin*. 1997;49: 15–35.
- 709 71. Teo S, Yeo RKH, Chong KY, Chung YF, Neo L, Tan HTW. The flora of Pulau Semakau: A Project  
710 Semakau checklist. *Nature in Singapore*. 2011;4: 263–272.
- 711 72. Corlett RT. Bukit Timah: the History and Significance of a Small Rain-forest Reserve. *Envir*  
712 *Conserv*. 1988;15: 37–44. doi:10.1017/S0376892900028435

- 713 73. Chan L, Davison GWH. Synthesis of results from the Comprehensive Biodiversity Survey of  
714 Bukit Timah Nature Reserve, Singapore, with recommendations for management. GBS.  
715 2019;71: 583–610. doi:10.26492/gbs71(suppl.1).2019-23
- 716 74. LaKrankie J, Davies SJ, Wang LK, Lee SK, Lum SKY. Forest Trees of Bukit Timah. Population  
717 ecology in a tropical forest fragment. Singapore: Simply Green; 2005.
- 718 75. Wong HF, Tan SY, Koh CY, Siow HJM, Li T, Heyzer A, et al. Checklist of the plant species of Nee  
719 Soon swamp forest, Singapore: Bryophytes to Angiosperms. National Parks Board and Raffles  
720 Museum of Biodiversity Research, National University of Singapore, Singapore. 2013.
- 721 76. Lee SY, Hamilton S, Barbier EB, Primavera J, Lewis RR. Better restoration policies are needed  
722 to conserve mangrove ecosystems. *Nat Ecol Evol.* 2019;3: 870–872. doi:10.1038/s41559-019-  
723 0861-y
- 724 77. Kodikara KAS, Mukherjee N, Jayatissa LP, Dahdouh-Guebas F, Koedam N. Have mangrove  
725 restoration projects worked? An in-depth study in Sri Lanka: Evaluation of mangrove  
726 restoration in Sri Lanka. *Restor Ecol.* 2017;25: 705–716. doi:10.1111/rec.12492
- 727 78. Chua MAH. The herpetofauna and mammals of Semakau landfill: A Project Semakau checklist.  
728 *Nature in Singapore.* 2011;4: 277–287.
- 729 79. Grootaert P. Species turnover between the northern and southern part of the South China  
730 Sea in the Elaphropeza Macquart mangrove fly communities of Hong Kong and Singapore  
731 (Insecta: Diptera: Hybotidae). *EJT.* 2019 [cited 20 Sep 2019]. doi:10.5852/ejt.2019.554
- 732 80. Lane DJW, Kingston T, Lee BPY-H. Dramatic decline in bat species richness in Singapore, with  
733 implications for Southeast Asia. *Biological Conservation.* 2006;131: 584–593.  
734 doi:10.1016/j.biocon.2006.03.005
- 735 81. Sodhi NS, Wilcove DS, Lee TM, Sekercioglu CH, Subaraj R, Bernard H, et al. Deforestation and  
736 Avian Extinction on Tropical Landbridge Islands: Bird Extinction on Tropical Islands.  
737 *Conservation Biology.* 2010;24: 1290–1298. doi:10.1111/j.1523-1739.2010.01495.x
- 738 82. Mikanowski J. ‘A different dimension of loss’: inside the great insect die-off. *The Guardian.* 14  
739 Dec 2017. Available: <https://www.theguardian.com/environment/2017/dec/14/a-different-dimension-of-loss-great-insect-die-off-sixth-extinction>. Accessed 20 Sep 2019.
- 741 83. Novotny V, Miller SE. Mapping and understanding the diversity of insects in the tropics: past  
742 achievements and future directions: Mapping tropical diversity of insects. *Austral Entomology.*  
743 2014;53: 259–267. doi:10.1111/aen.12111
- 744 84. Grootaert P. Revision of the genus *Thinophilus* Wahlberg (Diptera: Dolichopodidae) from  
745 Singapore and adjacent regions: A long term study with a prudent reconciliation of a genetic  
746 to a classic morphological approach. *Raffles Bulletin of Zoology.* 2018;66: 413–473.
- 747 85. Yeo D, Puniamorthy J, Ngiam RWJ, Meier R. Towards holomorphology in entomology: rapid  
748 and cost-effective adult-larva matching using NGS barcodes: Life-history stage matching with  
749 NGS barcodes. *Syst Entomol.* 2018;43: 678–691. doi:10.1111/syen.12296
- 750 86. Basset Y, Cizek L, Cuénoud P, Didham RK, Guilhaumon F, Missa O, et al. How many arthropod  
751 species live in a tropical forest. *Science.* 2012;338: 1481–1484.

- 752 87. Janzen DH. Insect diversity of a Costa Rican dry forest: why keep it, and how? *Biological*  
753 *Journal of the Linnean Society*. 1987;30: 343–356. doi:10.1111/j.1095-8312.1987.tb00307.x
- 754 88. Banda-R K, Delgado-Salinas A, Dexter KG, Linares-Palomino R, Oliveira-Filho A, Prado D, et al.  
755 Plant diversity patterns in neotropical dry forests and their conservation implications. *Science*.  
756 2016;353: 1383. doi:10.1126/science.aaf5080
- 757 89. Beirão MV, Neves FS, Penz CM, DeVries PJ, Fernandes GW. High butterfly beta diversity  
758 between Brazilian cerrado and cerrado–caatinga transition zones. *J Insect Conserv*. 2017;21:  
759 849–860. doi:10.1007/s10841-017-0024-x
- 760 90. Pennington RT, Lehmann CER, Rowland LM. Tropical savannas and dry forests. *Current*  
761 *Biology*. 2018;28: R541–R545. doi:10.1016/j.cub.2018.03.014
- 762 91. Baloğlu B, Clews E, Meier R. NGS barcoding reveals high resistance of a hyperdiverse  
763 chironomid (Diptera) swamp fauna against invasion from adjacent freshwater reservoirs.  
764 *Front Zool*. 2018;15: 31. doi:10.1186/s12983-018-0276-7
- 765 92. Ng PKL, Lim KKP. The conservation status of the Nee Soon freshwater swamp forest of  
766 Singapore. *Aquatic Conserv: Mar Freshw Ecosyst*. 1992;2: 255–266.  
767 doi:10.1002/aqc.3270020305
- 768 93. Turner IM, Min BC, Kwan WY, Ting CP. Freshwater swamp forest in Singapore, with particular  
769 reference to that found around the Nee Soon firing ranges. *The Gardens' Bulletin, Singapore*.  
770 1996;48: 129–157.
- 771 94. Wong WH, Tay YC, Puniamoorthy J, Balke M, Cranston PS, Meier R. 'Direct PCR' optimization  
772 yields a rapid, cost-effective, nondestructive and efficient method for obtaining DNA  
773 barcodes without DNA extraction. *Mol Ecol Resour*. 2014;14: 1271–1280. doi:10.1111/1755-  
774 0998.12275
- 775 95. Leray M, Yang JY, Meyer CP, Mills SC, Agudelo N, Ranwez V, et al. A new versatile primer set  
776 targeting a short fragment of the mitochondrial COI region for metabarcoding metazoan  
777 diversity: application for characterizing coral reef fish gut contents. *Front Zool*. 2013;10: 34.  
778 doi:10.1186/1742-9994-10-34
- 779 96. Geller J, Meyer C, Parker M, Hawk H. Redesign of PCR primers for mitochondrial cytochrome c  
780 oxidase subunit I for marine invertebrates and application in all-taxa biotic surveys. *Mol Ecol*  
781 *Resour*. 2013;13: 851–861. doi:10.1111/1755-0998.12138
- 782 97. Montero-Pau J, Gómez A, Muñoz J. Application of an inexpensive and high-throughput  
783 genomic DNA extraction method for the molecular ecology of zooplanktonic diapausing eggs:  
784 Rapid DNA extraction for diapausing eggs. *Limnol Oceanogr Methods*. 2008;6: 218–222.  
785 doi:10.4319/lom.2008.6.218
- 786 98. Srivathsan A, Baloğlu B, Wang W, Tan WX, Bertrand D, Ng AHQ, et al. A MinION™-based  
787 pipeline for fast and cost-effective DNA barcoding. *Mol Ecol Resour*. 2018;18: 1035–1049.  
788 doi:10.1111/1755-0998.12890
- 789 99. Srivathsan A, Sha JCM, Vogler AP, Meier R. Comparing the effectiveness of metagenomics and  
790 metabarcoding for diet analysis of a leaf-feeding monkey (*Pygathrix nemaeus*). *Mol Ecol*  
791 *Resour*. 2015;15: 250–261. doi:10.1111/1755-0998.12302



- 792 100. Ratnasingham S, Hebert PDN. A DNA-based registry for all animal species: The Barcode Index  
793 Number (BIN) system. Fontaneto D, editor. PLoS ONE. 2013;8: e66213.  
794 doi:10.1371/journal.pone.0066213
- 795 101. Chao A, Gotelli NJ, Hsieh TC, Sander EL, Ma KH, Colwell RK, et al. Rarefaction and  
796 extrapolation with Hill numbers: a framework for sampling and estimation in species diversity  
797 studies. Ecological Monographs. 2014;84: 45–67. doi:10.1890/13-0133.1
- 798 102. Clarke KR, Gorley RN. Primer. PRIMER-e, Plymouth. 2006.
- 799 103. Baselga A, Orme CDL. betapart: an R package for the study of beta diversity: *Betapart*  
800 *package*. Methods in Ecology and Evolution. 2012;3: 808–812. doi:10.1111/j.2041-  
801 210X.2012.00224.x
- 802 104. R Development Core Team. R: a language and environment for statistical computing. R  
803 Foundation for Statistical Computing, Vienna, Austria, [www.R-project.org](http://www.R-project.org). 2005.
- 804 105. Fox J, Weisberg S. An R companion to applied regression. Sage publications; 2018.
- 805

## **Acknowledgements**

All work described here was carried out as part of a comprehensive insect survey of Singapore which was carried out in collaboration and with support from the National Parks Board of Singapore (NParks). Special thanks go to the team from the National Biodiversity Centre of NParks for their assistance in fieldwork (Permits: NP/RP12-022-4, NP/RP12-022-5, NP/RP12-022-6) We would also like to thank the research staff, lab technicians, undergraduate students and interns of the Evolutionary Biology Laboratory for their help and assistance. This project would have been impossible without their hard work. Special thanks go to Lee Wan Ting, Yuen Huei Khee and Arina Adom. Financial support was provided by a Ministry of Education (R-154-000-A22-112) grant on biodiversity discovery (R-154-000-A22-112). The Hong Kong Mangroves project is supported by the Environment and Conservation Fund (ECF Project 69/2016) and we thank Dr. Christopher Taylor, Mr. Roy Shun-Chi Leung, and Ms. Ukyoung Chang, for their help in taking and sorting the samples and Dr Stefano Cannicci for his lead in the mangrove project. Mangrove insects in Brunei were sampled with permission from Brunei Forestry Department and Ministry of Primary Resources and Tourism during an UBD postdoctoral fellowship awarded to Claas Damken (Research and collecting permit file numbers: UBD/CAN-387(b)(SAA); UBD/ADM/R3(z)Pt.; UBD/PNC2/2/RG/1(293)). We thank Roman Carrasco for commenting on the manuscript.

## **Author information**

*National University of Singapore, Department of Biological Sciences*

Darren Yeo, Amrita Srivathsan, Jayanthi Puniamoorthy & Rudolf Meier

*Lee Kong Chian Natural History Museum, Singapore*

Foo Maosheng & Ang Yuchen

*Royal Belgian Institute of Natural Sciences, Brussels, Belgium and National Biodiversity*

*Centre of National Parks Board*

Patrick Grootaert

*The University of Hong Kong, School of Biological Sciences*

Benoit Guénard

*Universiti Brunei Darussalam, Institute for Biodiversity and Environmental Research*

Claas Damken & Rodzay A. Wahab

*National Parks Board, Singapore, International Biodiversity Conservation Division*

Lena Chan

### **Author contributions**

Darren Yeo: design of the work, acquisition, analysis, and interpretation of data, drafting and revising manuscript

Amrita Srivathsan: creation of new software used in the work, analysis and interpretation of data, revision of manuscript

Jayanthi Puniamoorthy: design of the work, acquisition of data, revision of manuscript

Foo Maosheng: design of the work, acquisition of data, revision of manuscript

Patrick Grootaert: conception and design of the work, acquisition of data, revision of manuscript

Lena Chan: conception and design of the work, revision of manuscript

Benoit Guénard: conception (Hong Kong), revision of manuscript

Claas Damken: conception (Brunei), acquisition of data, revision of manuscript

Rodzay A. Wahab: conception (Brunei), reading of manuscript

Ang Yuchen: identification of Diptera taxa, revision of manuscript

Rudolf Meier: conception and design of the work, data analysis and interpretation, drafted and revised manuscript

### **Corresponding author**

Correspondence to Rudolf Meier ([meier@nus.edu.sg](mailto:meier@nus.edu.sg))

Material requests to Darren Yeo ([darrn.yeo@gmail.com](mailto:darrn.yeo@gmail.com))

### **Competing interests**

None

**Table S1.** Collection periods and trap localities; M = mangroves, SF = swamp forest, UF = urban forest, TF = tropical rainforest, CF = coastal forest, FS = freshwater swamp.

| Sampling period     | Location                                        | Habitat type | GPS coordinates             | No. of traps | Total no. of weekly samples | Used for guild-level analyses |
|---------------------|-------------------------------------------------|--------------|-----------------------------|--------------|-----------------------------|-------------------------------|
| <b>Singapore</b>    |                                                 |              |                             |              |                             |                               |
| Apr 2012 – Mar 2014 | Pulau Ubin                                      | M            | 1°24'36.3"N 103°59'25.5"E   | 3            | 72                          | Y                             |
|                     | Pulau Semakau original                          | M            | 1°12'17.6"N 103°45'37.7"E   | 3            | 72                          | Y                             |
|                     | Pulau Semakau replanted                         | M            | 1°12'03.1"N 103°45'45.4"E   | 3            | 72                          | Y                             |
|                     | Sungei Buloh Wetland Reserve                    | M            | 1°26'46.3"N 103°43'49.9"E   | 2            | 48                          | Y                             |
|                     | Nee Soon freshwater swamp                       | SF           | 1°23'00.3"N 103°48'46.5"E   | 2            | 48                          | Y                             |
| May 2014 – Jun 2014 | Mandai Nature Park                              | M            | 1°26'18.3"N 103°45'49.7"E   | 3            | 6                           | N                             |
|                     | Pulau Tekong                                    | M            | 1°25'47.3"N 104°03'46.3"E   | 3            | 6                           | N                             |
|                     | Sarimbun                                        | M            | 1°25'59.1"N 103°41'21.8"E   | 3            | 6                           | N                             |
| Nov 2014 – May 2015 | Nee Soon freshwater swamp                       | SF           | 1°23'00.3"N 103°48'46.5"E   | 2            | 14                          | Y                             |
| Apr 2015 – Sep 2015 | NUS                                             | UF           | 1°17'49.6"N 103°46'35.7"E   | 4            | 24                          | Y                             |
| Mar 2016 – Aug 2016 | Pulau Ubin                                      | M            | 1°25'11.64"N 103°56'6.25"E  | 10           | 60                          | Y                             |
|                     | Sungei Buloh Wetland Reserve                    | M            | 1°26'43.20"N 103°43'5.10"E  | 10           | 60                          | Y                             |
|                     | Labrador Park                                   | M            | 1°16'13.3"N 103°48'10.1"E   | 3            | 18                          | N                             |
|                     | Labrador Park                                   | CF           | 1°16'05.4"N 103°48'16.2"E   | 2            | 18                          | N                             |
| Aug 2016 – Oct 2017 | Bukit Timah Nature Reserve primary forest       | TF           | 1°21'13.90"N 103°46'47.57"E | 3            | 45                          | Y                             |
|                     | Bukit Timah Nature Reserve old secondary forest | TF           | 1°21'17.96"N 103°46'54.01"E | 3            | 45                          | Y                             |
|                     | Bukit Timah Nature                              | TF           | 1°21'4.57"N 103°46'53.80"E  | 3            | 45                          | Y                             |

|                                     |                                   |    |                              |   |    |   |  |
|-------------------------------------|-----------------------------------|----|------------------------------|---|----|---|--|
|                                     | Reserve maturing secondary forest |    |                              |   |    |   |  |
| Apr 2017 – 20 Sep 2017              | NUS                               | UF | 1°17'49.6"N 103°46'35.7"E    | 4 | 18 | N |  |
| Sep 2017 – Dec 2017                 | NUS                               | UF | 1°17'45.3"N 103°46'13.8"E    | 3 | 16 | N |  |
| May 2018                            | Bishan-Ang Moh Kio Park           | UF | 1°21'35.7"N 103°50'49.9"E    | 2 | 2  | N |  |
|                                     | Enabling Village                  | UF | 1°17'13.6"N 103°48'53.3"E    | 1 | 1  | N |  |
|                                     | Esplanade Theatre                 | UF | 1°17'26.4"N 103°51'17.9"E    | 1 | 1  | N |  |
| Mar 2018 – Jun 2018                 | Sungei Buloh Wetland Reserve      | M  | 1°26'52.45"N 103°43'24.16"E  | 4 | 16 | N |  |
|                                     | Kranji Marshes                    | FS | 1°25'0.56"N 103°43'43.50"E   | 3 | 12 | N |  |
|                                     | Lim Chu Kang                      | M  | 1°26'48.80"N 103°42'35.71"E  | 2 | 8  | N |  |
|                                     | Mandai Nature Park                | M  | 1°26'37.96"N 103°45'59.70"E  | 4 | 16 | N |  |
|                                     | Pulau Ubin                        | CF | 1°24'26.3"N 103°57'16.3"E    | 3 | 12 | N |  |
|                                     | Pulau Ubin                        | M  | 1°24'32.2"N 103°57'12.1"E    | 8 | 32 | N |  |
|                                     | Labrador Park                     | M  | 1°16'13.3"N 103°48'10.1"E    | 5 | 20 | N |  |
|                                     | Labrador Park                     | CF | 1°16'05.4"N 103°48'16.2"E    | 4 | 20 | N |  |
| Mar 2019 – Jun 2019                 | Coney Island                      | M  | 1°24'37.3"N 103°55'23.1"E    | 5 | 15 | N |  |
|                                     | Kranji Marshes                    | FS | 1°25'11.0"N 103°43'54.3"E    | 4 | 15 | N |  |
|                                     | Pulau Ubin                        | CF | 1°25'34.7"N 103°56'29.2"E    | 1 | 15 | N |  |
|                                     | Pulau Ubin                        | M  | 1°25'05.3"N 103°56'06.5"E    | 7 | 15 | N |  |
| <b>Hong Kong</b>                    |                                   |    |                              |   |    |   |  |
| Nov 17 – Dec 17,<br>May 18 – Jul 18 | Ha Pak Nai                        | M  | 22°25'31.48"N 113°56'20.11"E | 6 | 30 | Y |  |
|                                     | Hang Mei                          | M  | 22°15'9.83"N 113°52'5.84"E   | 5 | 25 | Y |  |
|                                     | Ho Chung                          | M  | 22°21'13.18"N 114°15'7.45"E  | 6 | 30 | Y |  |
|                                     | Lai Chi Wo                        | M  | 22°31'37.63"N 114°15'43.63"E | 5 | 25 | Y |  |
|                                     | Nam Chung                         | M  | 22°31'31.62"N 114°12'28.94"E | 5 | 25 | Y |  |
|                                     | Sai Keng                          | M  | 22°25'13.48"N 114°16'4.66"E  | 5 | 25 | Y |  |
|                                     | Sam A Chung                       | M  | 22°30'29.84"N 114°16'20.93"E | 5 | 25 | Y |  |

|                 |                     |   |                              |    |    |   |
|-----------------|---------------------|---|------------------------------|----|----|---|
|                 | Sam A Tsuen         | M | 22°30'55.22"N 114°16'16.36"E | 5  | 25 | Y |
|                 | Sha Tau Kok         | M | 22°32'4.34"N 114°12'39.78"E  | 10 | 50 | Y |
|                 | Sheung Pak Nai      | M | 22°27'7.09"N 113°57'45.11"E  | 5  | 25 | Y |
|                 | Shui Hau            | M | 22°13'9.70"N 113°55'8.33"E   | 5  | 25 | Y |
|                 | So Lo Pun           | M | 22°32'17.20"N 114°15'21.49"E | 5  | 25 | Y |
|                 | Tai O               | M | 22°15'28.44"N 113°51'48.96"E | 6  | 30 | Y |
|                 | Tai Tam             | M | 22°14'46.10"N 114°13'24.02"E | 3  | 15 | Y |
|                 | Tai Tan             | M | 22°26'18.85"N 114°19'59.77"E | 1  | 5  | Y |
|                 | To Kwa Peng         | M | 22°25'43.07"N 114°19'59.30"E | 5  | 25 | Y |
|                 | Tsim Bei Tsui       | M | 22°29'20.47"N 113°59'53.95"E | 5  | 25 | Y |
|                 | Tung Chung          | M | 22°16'52.50"N 113°55'44.04"E | 6  | 30 | Y |
|                 | Wong Chuk Wan       | M | 22°23'44.27"N 114°17'10.21"E | 5  | 25 | Y |
|                 | Yim Tin Tsai        | M | 22°22'32.74"N 114°18'5.76"E  | 5  | 25 | Y |
| <b>Brunei</b>   |                     |   |                              |    |    |   |
| Jul 14 – Nov 14 | Pulau Berembang     | M | 4°54'7.44"N 115°1'17.94"E    | 2  | 10 | Y |
|                 | Labu Forest Reserve | M | 4°51'41.75"N 115°6'59.69"E   | 2  | 10 | Y |
|                 | Tutong Forest       | M | 4°46'9.54"N 114°36'20.64"E   | 2  | 10 | Y |





|                       |                           |   |   |   |   |   |
|-----------------------|---------------------------|---|---|---|---|---|
| <b>Chloropidae</b>    | <i>Tricimba</i>           |   |   |   | ✓ |   |
| <b>Clusiidae</b>      |                           | ✓ |   |   |   | ✓ |
| <b>Coelopidae</b>     |                           | ✓ |   |   |   |   |
| <b>Cryptochetidae</b> |                           |   | ✓ |   |   |   |
| <b>Culicidae</b>      |                           |   |   |   | ✓ | ✓ |
| <b>Diastatidae</b>    |                           |   |   |   |   | ✓ |
| <b>Diopsidae</b>      |                           | ✓ |   |   |   | ✓ |
| <b>Dolichopodidae</b> |                           |   |   | ✓ |   |   |
| <b>Drosophilidae</b>  | <i>Apenthecia</i>         | ✓ |   |   |   |   |
| <b>Drosophilidae</b>  | <i>Chymomyza</i>          | ✓ |   |   |   |   |
| <b>Drosophilidae</b>  | <i>Colocasiomyia</i>      | ✓ |   |   |   |   |
| <b>Drosophilidae</b>  | <i>Dichaetophora</i>      |   | ✓ |   |   |   |
| <b>Drosophilidae</b>  | <i>Drosophila</i>         |   |   |   |   | ✓ |
| <b>Drosophilidae</b>  | <i>Gitona</i>             | ✓ |   |   |   |   |
| <b>Drosophilidae</b>  | <i>Hirtodrosophila</i>    |   | ✓ |   |   |   |
| <b>Drosophilidae</b>  | <i>Hypselothyrea</i>      | ✓ |   |   |   |   |
| <b>Drosophilidae</b>  | <i>Leucophenga</i>        | ✓ |   |   |   |   |
| <b>Drosophilidae</b>  | <i>Liodrosophila</i>      | ✓ |   |   |   |   |
| <b>Drosophilidae</b>  | <i>Luzonimyia</i>         |   |   |   |   | ✓ |
| <b>Drosophilidae</b>  | <i>Microdrosophila</i>    | ✓ |   |   |   |   |
| <b>Drosophilidae</b>  | <i>Mycodrosophila</i>     |   | ✓ |   |   |   |
| <b>Drosophilidae</b>  | <i>Paramycodrosophila</i> |   | ✓ |   |   |   |
| <b>Drosophilidae</b>  | <i>Scaptodrosophila</i>   | ✓ |   |   |   |   |
| <b>Drosophilidae</b>  | <i>Scaptomyza</i>         | ✓ |   |   |   |   |
| <b>Drosophilidae</b>  | <i>Stegana</i>            | ✓ |   |   |   |   |
| <b>Drosophilidae</b>  | <i>Zaprionus</i>          | ✓ |   |   |   |   |
| <b>Empididae</b>      |                           |   |   | ✓ |   |   |
| <b>Ephydriidae</b>    | <i>Allotrichoma</i>       |   |   |   |   | ✓ |
| <b>Ephydriidae</b>    | <i>Atissa</i>             |   |   |   |   | ✓ |
| <b>Ephydriidae</b>    | <i>Brachydeutera</i>      | ✓ |   |   |   |   |
| <b>Ephydriidae</b>    | <i>Cerobothrium</i>       |   |   |   |   | ✓ |
| <b>Ephydriidae</b>    | <i>Ceropsilopa</i>        | ✓ |   |   |   |   |
| <b>Ephydriidae</b>    | <i>Discocerina</i>        | ✓ |   |   |   |   |
| <b>Ephydriidae</b>    | <i>Donaceus</i>           |   |   |   |   | ✓ |

|                         |                        |   |   |   |   |
|-------------------------|------------------------|---|---|---|---|
| <b>Ephydridae</b>       | <i>Glenanthe</i>       |   |   |   | ✓ |
| <b>Ephydridae</b>       | <i>Hecamedoides</i>    |   |   |   | ✓ |
| <b>Ephydridae</b>       | <i>Hydrellia</i>       | ✓ |   |   |   |
| <b>Ephydridae</b>       | <i>Limnellia</i>       |   |   |   | ✓ |
| <b>Ephydridae</b>       | <i>Nostima</i>         | ✓ |   |   |   |
| <b>Ephydridae</b>       | <i>Notiphila</i>       |   |   |   | ✓ |
| <b>Ephydridae</b>       | <i>Ochthera</i>        |   |   | ✓ |   |
| <b>Ephydridae</b>       | <i>Orasiopa</i>        |   |   |   | ✓ |
| <b>Ephydridae</b>       | <i>Paralimna</i>       | ✓ |   |   |   |
| <b>Ephydridae</b>       | <i>Placopsidella</i>   |   |   | ✓ |   |
| <b>Ephydridae</b>       | <i>Polytrichophora</i> |   |   |   | ✓ |
| <b>Ephydridae</b>       | <i>Ptilomyia</i>       |   |   |   | ✓ |
| <b>Ephydridae</b>       | <i>Rhynchopsilopa</i>  |   |   |   | ✓ |
| <b>Ephydridae</b>       | <i>Trimerogastra</i>   |   |   |   | ✓ |
| <b>Ephydridae</b>       | <i>Trypetomima</i>     |   |   |   | ✓ |
| <b>Ephydridae</b>       | <i>Zeros</i>           |   |   |   | ✓ |
| <b>Hybotidae</b>        |                        |   |   | ✓ |   |
| <b>Keroplastidae</b>    |                        | ✓ | ✓ |   |   |
| <b>Lauxaniidae</b>      |                        | ✓ |   |   |   |
| <b>Lonchaeidae</b>      |                        | ✓ |   |   |   |
| <b>Lygistorrhinidae</b> |                        | ✓ | ✓ |   |   |
| <b>Megamerinidae</b>    |                        |   |   | ✓ |   |
| <b>Micropezidae</b>     |                        |   |   |   | ✓ |
| <b>Milichiidae</b>      | <i>Aldrichiomyza</i>   |   |   |   | ✓ |
| <b>Milichiidae</b>      | <i>Leptometopa</i>     |   |   | ✓ |   |
| <b>Milichiidae</b>      | <i>Milichia</i>        |   |   |   | ✓ |
| <b>Milichiidae</b>      | <i>Milichiella</i>     |   |   | ✓ |   |
| <b>Milichiidae</b>      | <i>Neophyllomyza</i>   | ✓ |   |   |   |
| <b>Milichiidae</b>      | <i>Paramyia</i>        |   |   |   | ✓ |
| <b>Milichiidae</b>      | <i>Phyllomyza</i>      |   |   | ✓ |   |
| <b>Muscidae</b>         |                        |   |   |   | ✓ |
| <b>Mycetophilidae</b>   |                        | ✓ | ✓ |   |   |
| <b>Neriidae</b>         |                        | ✓ |   |   | ✓ |
| <b>Odiniidae</b>        |                        |   |   |   | ✓ |

|                        |                       |   |   |  |   |   |   |
|------------------------|-----------------------|---|---|--|---|---|---|
| <b>Periscolidae</b>    |                       | ✓ |   |  |   |   |   |
| <b>Phoridae</b>        |                       |   |   |  |   |   | ✓ |
| <b>Pipunculidae</b>    |                       |   |   |  | ✓ |   |   |
| <b>Platypozidae</b>    |                       |   | ✓ |  |   | ✓ |   |
| <b>Platystomatidae</b> |                       |   |   |  |   |   | ✓ |
| <b>Psilidae</b>        |                       | ✓ |   |  |   |   |   |
| <b>Pyrgotidae</b>      |                       |   |   |  | ✓ |   |   |
| <b>Rhagionidae</b>     |                       |   |   |  | ✓ | ✓ |   |
| <b>Rhiniidae</b>       |                       |   |   |  | ✓ |   |   |
| <b>Sarcophagidae</b>   |                       |   |   |  |   |   | ✓ |
| <b>Sciaridae</b>       |                       | ✓ | ✓ |  |   |   |   |
| <b>Sphaeroceridae</b>  |                       |   |   |  |   |   | ✓ |
| <b>Stratiomyiidae</b>  |                       | ✓ |   |  |   | ✓ |   |
| <b>Syrphidae</b>       | <i>Allobaccha</i>     |   | ✓ |  | ✓ |   |   |
| <b>Syrphidae</b>       | <i>Allograpta</i>     |   | ✓ |  | ✓ |   |   |
| <b>Syrphidae</b>       | <i>Asarkina</i>       |   | ✓ |  | ✓ |   |   |
| <b>Syrphidae</b>       | <i>Ceriana</i>        |   | ✓ |  |   | ✓ |   |
| <b>Syrphidae</b>       | <i>Eosmallota</i>     |   | ✓ |  |   | ✓ |   |
| <b>Syrphidae</b>       | <i>Eristalinus</i>    |   | ✓ |  |   | ✓ |   |
| <b>Syrphidae</b>       | <i>Eristalis</i>      |   | ✓ |  |   | ✓ |   |
| <b>Syrphidae</b>       | <i>Eumerus</i>        |   | ✓ |  |   | ✓ |   |
| <b>Syrphidae</b>       | <i>Graptomyza</i>     |   | ✓ |  |   | ✓ |   |
| <b>Syrphidae</b>       | <i>Ischiodon</i>      |   | ✓ |  | ✓ |   |   |
| <b>Syrphidae</b>       | <i>Microdon</i>       |   | ✓ |  | ✓ |   |   |
| <b>Syrphidae</b>       | <i>Paragus</i>        |   | ✓ |  | ✓ |   |   |
| <b>Syrphidae</b>       | <i>Psilota</i>        |   | ✓ |  |   | ✓ |   |
| <b>Syrphidae</b>       | <i>Spheginobaccha</i> |   | ✓ |  |   |   | ✓ |
| <b>Syrphidae</b>       | <i>Syrpita</i>        |   | ✓ |  |   | ✓ |   |
| <b>Syrphidae</b>       | <i>Volucella</i>      |   | ✓ |  |   | ✓ |   |
| <b>Tabanidae</b>       |                       |   |   |  | ✓ | ✓ |   |
| <b>Tachinidae</b>      |                       |   |   |  | ✓ |   | ✓ |
| <b>Tephritidae</b>     |                       | ✓ |   |  |   |   |   |
| <b>Ulidiidae</b>       |                       |   |   |  |   |   | ✓ |
| <b>Xenasteiidae</b>    |                       |   |   |  |   |   | ✓ |

|                    |                      |  |   |   |
|--------------------|----------------------|--|---|---|
| Xylomyidae         |                      |  |   | ✓ |
| <b>Hymenoptera</b> |                      |  |   |   |
| Aphelinidae        |                      |  | ✓ |   |
| Apidae             | ✓                    |  |   |   |
| Bethylidae         |                      |  | ✓ | ✓ |
| Braconidae         |                      |  | ✓ |   |
| Ceraphronidae      |                      |  | ✓ |   |
| Chalcidae          |                      |  | ✓ |   |
| Chrysididae        |                      |  | ✓ |   |
| Colletidae         | ✓                    |  |   |   |
| Crabronidae        |                      |  |   | ✓ |
| Diapriidae         |                      |  | ✓ |   |
| Dryinidae          |                      |  | ✓ |   |
| Eulophidae         |                      |  | ✓ |   |
| Eupelmidae         |                      |  | ✓ |   |
| Evaniidae          |                      |  | ✓ |   |
| Figitidae          |                      |  | ✓ |   |
| Formicidae         | <i>Acropyga</i>      |  |   | ✓ |
| Formicidae         | <i>Anochetus</i>     |  |   | ✓ |
| Formicidae         | <i>Anoplolepis</i>   |  |   | ✓ |
| Formicidae         | <i>Aphaenogaster</i> |  |   | ✓ |
| Formicidae         | <i>Brachyponera</i>  |  |   | ✓ |
| Formicidae         | <i>Camponotus</i>    |  |   | ✓ |
| Formicidae         | <i>Cardiocondyla</i> |  |   | ✓ |
| Formicidae         | <i>Carebara</i>      |  |   | ✓ |
| Formicidae         | <i>Cataulacus</i>    |  |   | ✓ |
| Formicidae         | <i>Chronoxenus</i>   |  |   | ✓ |
| Formicidae         | <i>Colobopsis</i>    |  |   | ✓ |
| Formicidae         | <i>Crematogaster</i> |  |   | ✓ |
| Formicidae         | <i>Cryptopone</i>    |  |   | ✓ |
| Formicidae         | <i>Diacamma</i>      |  |   | ✓ |
| Formicidae         | <i>Discothyrea</i>   |  |   | ✓ |
| Formicidae         | <i>Dolichoderus</i>  |  |   | ✓ |
| Formicidae         | <i>Echinopla</i>     |  |   | ✓ |

|                   |                         |   |   |   |
|-------------------|-------------------------|---|---|---|
| <b>Formicidae</b> | <i>Ectomomyrmex</i>     |   | ✓ |   |
| <b>Formicidae</b> | <i>Euponera</i>         |   | ✓ |   |
| <b>Formicidae</b> | <i>Euprenolepis</i>     |   |   | ✓ |
| <b>Formicidae</b> | <i>Gauromyrmex</i>      |   |   | ✓ |
| <b>Formicidae</b> | <i>Hypoponera</i>       |   | ✓ |   |
| <b>Formicidae</b> | <i>Iridomyrmex</i>      |   |   | ✓ |
| <b>Formicidae</b> | <i>Leptogenys</i>       |   |   | ✓ |
| <b>Formicidae</b> | <i>Lioponera</i>        |   | ✓ |   |
| <b>Formicidae</b> | <i>Mayriella</i>        |   |   | ✓ |
| <b>Formicidae</b> | <i>Meranoplus</i>       |   |   | ✓ |
| <b>Formicidae</b> | <i>Mesoponera</i>       |   |   | ✓ |
| <b>Formicidae</b> | <i>Monomorium</i>       |   |   | ✓ |
| <b>Formicidae</b> | <i>Myrmecina</i>        |   | ✓ |   |
| <b>Formicidae</b> | <i>Nylanderia</i>       |   |   | ✓ |
| <b>Formicidae</b> | <i>Odontomachus</i>     |   |   | ✓ |
| <b>Formicidae</b> | <i>Odontoponera</i>     |   |   | ✓ |
| <b>Formicidae</b> | <i>Oecophylla</i>       |   |   | ✓ |
| <b>Formicidae</b> | <i>Paraparatrechina</i> |   |   | ✓ |
| <b>Formicidae</b> | <i>Paratopula</i>       |   |   | ✓ |
| <b>Formicidae</b> | <i>Paratrechina</i>     |   |   | ✓ |
| <b>Formicidae</b> | <i>Pheidole</i>         |   |   | ✓ |
| <b>Formicidae</b> | <i>Philidris</i>        | ✓ |   |   |
| <b>Formicidae</b> | <i>Platythyrea</i>      |   | ✓ |   |
| <b>Formicidae</b> | <i>Polyrhachis</i>      | ✓ |   |   |
| <b>Formicidae</b> | <i>Ponera</i>           |   |   | ✓ |
| <b>Formicidae</b> | <i>Prenolepis</i>       |   |   | ✓ |
| <b>Formicidae</b> | <i>Prionopelta</i>      |   |   | ✓ |
| <b>Formicidae</b> | <i>Proatta</i>          |   | ✓ |   |
| <b>Formicidae</b> | <i>Probolomyrmex</i>    |   |   | ✓ |
| <b>Formicidae</b> | <i>Pseudoneoponera</i>  |   | ✓ |   |
| <b>Formicidae</b> | <i>Strumigenys</i>      |   | ✓ |   |
| <b>Formicidae</b> | <i>Rhopalomastix</i>    |   | ✓ |   |
| <b>Formicidae</b> | <i>Solenopsis</i>       |   |   | ✓ |
| <b>Formicidae</b> | <i>Stigmatomma</i>      |   | ✓ |   |

|                          |                     |   |   |   |
|--------------------------|---------------------|---|---|---|
| <b>Formicidae</b>        | <i>Strumigenys</i>  |   | ✓ |   |
| <b>Formicidae</b>        | <i>Tapinoma</i>     |   |   | ✓ |
| <b>Formicidae</b>        | <i>Technomyrmex</i> |   |   | ✓ |
| <b>Formicidae</b>        | <i>Tetramorium</i>  |   | ✓ |   |
| <b>Formicidae</b>        | <i>Tetraoponera</i> | ✓ |   |   |
| <b>Formicidae</b>        | <i>Vollenhovia</i>  |   |   | ✓ |
| <b>Halictidae</b>        |                     | ✓ |   |   |
| <b>Ichneumonidae</b>     |                     |   | ✓ |   |
| <b>Megachilidae</b>      |                     | ✓ |   |   |
| <b>Mymaridae</b>         |                     |   | ✓ |   |
| <b>Platygastridae</b>    |                     |   | ✓ |   |
| <b>Pompilidae</b>        |                     |   | ✓ |   |
| <b>Pteromalidae</b>      |                     |   | ✓ |   |
| <b>Scoliidae</b>         |                     |   | ✓ |   |
| <b>Sphecidae</b>         |                     |   | ✓ |   |
| <b>Sphecidae</b>         |                     |   |   | ✓ |
| <b>Tiphiidae</b>         |                     |   | ✓ |   |
| <b>Trichogrammatidae</b> |                     |   | ✓ |   |
| <b>Vespidae</b>          |                     | ✓ |   | ✓ |

**Table S3.** Number of specimens from Singapore, Hong Kong and Brunei, as well as the size of the randomized subsample from Singapore.

| Taxon          | No. of Specimens |                      |             |             |            |
|----------------|------------------|----------------------|-------------|-------------|------------|
|                | Singapore        | Singapore (Rarefied) | Hong Kong   | Brunei      | Thailand   |
| Dolichopodidae | 17860            | 2800                 | 2563        | 2798        | 924        |
| Phoridae       | 2134             | 560                  | 562         | 272         | -          |
| Mycetophilidae | 223              | 180                  | 186         | -           | -          |
| <b>Total</b>   | <b>20217</b>     | <b>3540</b>          | <b>3311</b> | <b>3070</b> | <b>924</b> |

**Table S4.** Number of species of vascular plants for each sampling site in Singapore from checklist data.

| <b>Sampling Site</b>         | <b>Habitat</b>              | <b>No. of Plant Species</b> | <b>Reference</b>               |
|------------------------------|-----------------------------|-----------------------------|--------------------------------|
| Nee Soon freshwater swamp    | Freshwater swamp forest     | 1150                        | Wong et al., 2013 <sup>1</sup> |
| Bukit Timah Nature Reserve   | Rainforest                  | 1250                        | Ho et al., 2019 <sup>2</sup>   |
| Kent Ridge                   | Urban-edge/disturbed forest | 420                         | Tan et al., 2019 <sup>3</sup>  |
| Pulau Ubin                   | Mangrove                    | 245                         | Lee et al., 2003 <sup>4</sup>  |
| Sungei Buloh Wetland Reserve | Mangrove                    | 249                         | Tan et al., 1997 <sup>5</sup>  |
| Pulau Semakau                | Mangrove                    | 165                         | Teo et al., 2011 <sup>6</sup>  |



**Table S5.** Number and distribution of mOTUs delimited using different thresholds (144,865 barcoded specimens)

| Habitat/Country                             | No. of Barcodes | No. of mOTUs from Objective Clustering |             |             | No. of mOTUs from USEARCH |             |             |
|---------------------------------------------|-----------------|----------------------------------------|-------------|-------------|---------------------------|-------------|-------------|
|                                             |                 | 2%                                     | 3%          | 4%          | id=0.98                   | id=0.97     | id=0.96     |
| <b>Singapore full dataset</b>               |                 |                                        |             |             |                           |             |             |
| <b>Mangroves</b>                            | 67239           | 3557                                   | 3437        | 3320        | 3710                      | 3524        | 3436        |
| <b>Rainforest</b>                           | 15669           | 2625                                   | 2573        | 2539        | 2669                      | 2603        | 2570        |
| <b>Swamp forest</b>                         | 9464            | 1843                                   | 1804        | 1753        | 1895                      | 1828        | 1795        |
| <b>Urban forest</b>                         | 20323           | 1552                                   | 1515        | 1478        | 1616                      | 1549        | 1510        |
| <b>Freshwater swamp</b>                     | 21994           | 1881                                   | 1812        | 1744        | 1988                      | 1878        | 1805        |
| <b>Coastal forest</b>                       | 9118            | 1707                                   | 1667        | 1627        | 1755                      | 1691        | 1664        |
| <b>Total</b>                                | <b>143807</b>   | <b>8903</b>                            | <b>8572</b> | <b>8256</b> | <b>9315</b>               | <b>8821</b> | <b>8520</b> |
| <b>Subset used for guild-level analysis</b> |                 |                                        |             |             |                           |             |             |
| <b>Mangroves</b>                            | 37641           | 1778                                   | 1720        | 1673        | 1828                      | 1744        | 1702        |
| <b>Rainforest</b>                           | 9212            | 1525                                   | 1490        | 1474        | 1545                      | 1503        | 1483        |
| <b>Swamp forest</b>                         | 5893            | 1090                                   | 1052        | 1030        | 1105                      | 1070        | 1048        |
| <b>Urban forest</b>                         | 9320            | 919                                    | 898         | 885         | 941                       | 908         | 893         |
| <b>Total</b>                                | <b>62066</b>    | <b>4169</b>                            | <b>4002</b> | <b>3917</b> | <b>4298</b>               | <b>4098</b> | <b>3994</b> |
| <b>Southeast and East Asian datasets</b>    |                 |                                        |             |             |                           |             |             |
| <i>Dolichopodidae</i>                       |                 |                                        |             |             |                           |             |             |
| <b>Singapore</b>                            | 17860           | 263                                    | 254         | 248         | 280                       | 259         | 249         |
| <b>Hong Kong</b>                            | 2601            | 111                                    | 109         | 104         | 115                       | 110         | 106         |
| <b>Brunei</b>                               | 2800            | 98                                     | 96          | 95          | 107                       | 98          | 95          |
| <b>Thailand</b>                             | 924             | 80                                     | 74          | 72          | 93                        | 80          | 73          |
| <b>Total</b>                                | <b>24185</b>    | <b>480</b>                             | <b>453</b>  | <b>426</b>  | <b>543</b>                | <b>482</b>  | <b>447</b>  |
| <i>Phoridae</i>                             |                 |                                        |             |             |                           |             |             |
| <b>Singapore</b>                            | 2134            | 293                                    | 281         | 278         | 300                       | 285         | 280         |
| <b>Hong Kong</b>                            | 562             | 137                                    | 129         | 125         | 138                       | 130         | 129         |
| <b>Brunei</b>                               | 272             | 76                                     | 76          | 75          | 77                        | 76          | 75          |
| <b>Total</b>                                | <b>2968</b>     | <b>453</b>                             | <b>429</b>  | <b>417</b>  | <b>467</b>                | <b>437</b>  | <b>431</b>  |
| <i>Mycetophilidae</i>                       |                 |                                        |             |             |                           |             |             |
| <b>Singapore</b>                            | 223             | 45                                     | 44          | 43          | 45                        | 44          | 44          |
| <b>Hong Kong</b>                            | 186             | 26                                     | 25          | 25          | 26                        | 25          | 25          |
| <b>Total</b>                                | <b>409</b>      | <b>69</b>                              | <b>67</b>   | <b>67</b>   | <b>70</b>                 | <b>67</b>   | <b>67</b>   |

**Table S6.** Common and rare species found in only 1, 2, 3, 4, 5 or all habitats.

|                                          | No. of species |               |               |                              |                               |
|------------------------------------------|----------------|---------------|---------------|------------------------------|-------------------------------|
|                                          | Full dataset   | No singletons | No doubletons | No species with <5 specimens | No species with <10 specimens |
| Species in <b>mangroves</b> only         | 1788           | 880           | 638           | 441                          | 256                           |
| Species in <b>rainforests</b> only       | 1569           | 638           | 415           | 243                          | 91                            |
| Species in <b>swamp forests</b> only     | 875            | 342           | 200           | 102                          | 39                            |
| Species in <b>urban forests</b> only     | 509            | 166           | 101           | 58                           | 25                            |
| Species in <b>freshwater swamps</b> only | 794            | 360           | 237           | 127                          | 56                            |
| Species in <b>coastal forests</b> only   | 454            | 153           | 71            | 33                           | 14                            |
| Species in <b>two habitats</b>           | 1580           | 1580          | 1253          | 887                          | 555                           |
| Species in <b>three habitats</b>         | 565            | 565           | 565           | 494                          | 350                           |
| Species in <b>four habitats</b>          | 274            | 274           | 274           | 265                          | 230                           |
| Species in <b>five habitats</b>          | 116            | 116           | 116           | 116                          | 109                           |
| Species in <b>all habitats</b>           | 48             | 48            | 48            | 48                           | 48                            |
| <b>Total</b>                             | <b>8572</b>    | <b>5122</b>   | <b>3918</b>   | <b>2814</b>                  | <b>1773</b>                   |

**Table S7.** Species turnover ANOSIM analysis results indicate distinct communities in each habitat type, whether with singletons and doubletons removed, or species with less than 5 and 10 specimens. Pairwise p-value outputs are displayed in the bottom-left of the pairwise matrix while the R-statistics are displayed at the top-right.

**No Singletons**

Overall P: 0.001

Overall R: 0.777

|                  | Rainforest | Urban forest | Swamp forest | Mangrove | Freshwater swamp | Coastal forest |
|------------------|------------|--------------|--------------|----------|------------------|----------------|
| Rainforest       |            | 0.809        | 0.981        | 0.948    | 0.972            | 0.951          |
| Urban forest     | 0.001      |              | 0.747        | 0.815    | 0.571            | 0.173          |
| Swamp forest     | 0.001      | 0.001        |              | 0.927    | 0.756            | 0.893          |
| Mangrove         | 0.001      | 0.001        | 0.001        |          | 0.852            | 0.541          |
| Freshwater swamp | 0.001      | 0.001        | 0.008        | 0.001    |                  | 0.347          |
| Coastal forest   | 0.001      | 0.083        | 0.005        | 0.001    | 0.017            |                |

**No Doubletons**

Overall P: 0.001

Overall R: 0.774

|                  | Rainforest | Urban forest | Swamp forest | Mangrove | Freshwater swamp | Coastal forest |
|------------------|------------|--------------|--------------|----------|------------------|----------------|
| Rainforest       |            | 0.803        | 0.980        | 0.946    | 0.972            | 0.954          |
| Urban forest     | 0.001      |              | 0.735        | 0.816    | 0.563            | 0.179          |
| Swamp forest     | 0.001      | 0.001        |              | 0.922    | 0.750            | 0.889          |
| Mangrove         | 0.001      | 0.001        | 0.001        |          | 0.849            | 0.538          |
| Freshwater swamp | 0.001      | 0.001        | 0.008        | 0.001    |                  | 0.331          |
| Coastal forest   | 0.002      | 0.072        | 0.005        | 0.001    | 0.019            |                |

**No Species <5 Specimens**

Overall P: 0.001

Overall R: 0.767

|                  | Rainforest | Urban forest | Swamp forest | Mangrove | Freshwater swamp | Coastal forest |
|------------------|------------|--------------|--------------|----------|------------------|----------------|
| Rainforest       |            | 0.795        | 0.970        | 0.941    | 0.971            | 0.954          |
| Urban forest     | 0.001      |              | 0.720        | 0.817    | 0.559            | 0.180          |
| Swamp forest     | 0.001      | 0.001        |              | 0.913    | 0.750            | 0.885          |
| Mangrove         | 0.001      | 0.001        | 0.001        |          | 0.843            | 0.533          |
| Freshwater swamp | 0.002      | 0.001        | 0.008        | 0.001    |                  | 0.331          |
| Coastal forest   | 0.002      | 0.061        | 0.005        | 0.001    | 0.017            |                |

**No Species <10 Specimens**

**Overall P: 0.001**

**Overall R: 0.759**

|                         | <b>Rainforest</b> | <b>Urban forest</b> | <b>Swamp forest</b> | <b>Mangrove</b> | <b>Freshwater swamp</b> | <b>Coastal forest</b> |
|-------------------------|-------------------|---------------------|---------------------|-----------------|-------------------------|-----------------------|
| <b>Rainforest</b>       |                   | 0.779               | 0.959               | 0.934           | 0.967                   | 0.952                 |
| <b>Urban forest</b>     | 0.001             |                     | 0.701               | 0.819           | 0.548                   | 0.178                 |
| <b>Swamp forest</b>     | 0.001             | 0.002               |                     | 0.904           | 0.738                   | 0.877                 |
| <b>Mangrove</b>         | 0.001             | 0.001               | 0.001               |                 | 0.837                   | 0.526                 |
| <b>Freshwater swamp</b> | 0.002             | 0.001               | 0.008               | 0.001           |                         | 0.331                 |
| <b>Coastal forest</b>   | 0.001             | 0.062               | 0.005               | 0.001           | 0.017                   |                       |

**Table S8.** Species turnover SIMPER analysis results indicate distinct communities in each habitat type, whether with singletons and doubletons removed, or species with less than 5 and 10 specimens.

**No Singletons**

|                         | Within habitat (%) | Between habitats (%) |              |              |          |                   |                |
|-------------------------|--------------------|----------------------|--------------|--------------|----------|-------------------|----------------|
|                         |                    | Rain-forest          | Urban forest | Swamp forest | Mangrove | Fresh-water swamp | Coastal forest |
| <b>Rainforest</b>       | 33.65              |                      |              |              |          |                   |                |
| <b>Urban forest</b>     | 13.70              | 3.57                 |              |              |          |                   |                |
| <b>Swamp forest</b>     | 35.74              | 15.86                | 3.31         |              |          |                   |                |
| <b>Mangrove</b>         | 12.78              | 1.80                 | 3.26         | 2.22         |          |                   |                |
| <b>Freshwater swamp</b> | 18.80              | 2.36                 | 5.06         | 4.57         | 2.93     |                   |                |
| <b>Coastal forest</b>   | 12.98              | 4.27                 | 10.04        | 4.50         | 6.44     | 9.82              |                |

**No Doubletons**

|                         | Within habitat (%) | Between habitats (%) |              |              |          |                   |                |
|-------------------------|--------------------|----------------------|--------------|--------------|----------|-------------------|----------------|
|                         |                    | Rain-forest          | Urban forest | Swamp forest | Mangrove | Fresh-water swamp | Coastal forest |
| <b>Rainforest</b>       | 35.83              |                      |              |              |          |                   |                |
| <b>Urban forest</b>     | 14.15              | 3.79                 |              |              |          |                   |                |
| <b>Swamp forest</b>     | 38.05              | 17.12                | 3.55         |              |          |                   |                |
| <b>Mangrove</b>         | 13.14              | 1.91                 | 3.36         | 2.39         |          |                   |                |
| <b>Freshwater swamp</b> | 19.61              | 2.52                 | 5.30         | 4.90         | 3.07     |                   |                |
| <b>Coastal forest</b>   | 13.62              | 4.57                 | 10.44        | 4.86         | 6.68     | 10.37             |                |

**No Species <5 Specimens**

|                         | Within habitat (%) | Between habitats (%) |              |              |          |                   |                |
|-------------------------|--------------------|----------------------|--------------|--------------|----------|-------------------|----------------|
|                         |                    | Rain-forest          | Urban forest | Swamp forest | Mangrove | Fresh-water swamp | Coastal forest |
| <b>Rainforest</b>       | 38.68              |                      |              |              |          |                   |                |
| <b>Urban forest</b>     | 14.86              | 4.13                 |              |              |          |                   |                |
| <b>Swamp forest</b>     | 40.06              | 18.89                | 3.93         |              |          |                   |                |
| <b>Mangrove</b>         | 13.65              | 2.08                 | 3.50         | 2.65         |          |                   |                |
| <b>Freshwater swamp</b> | 20.84              | 2.76                 | 5.68         | 5.46         | 3.29     |                   |                |
| <b>Coastal forest</b>   | 14.49              | 4.99                 | 11.08        | 5.39         | 7.03     | 11.15             |                |

**No Species <10 Specimens**

|                         | Within habitat (%) | Between habitats (%) |              |              |          |                   |                |
|-------------------------|--------------------|----------------------|--------------|--------------|----------|-------------------|----------------|
|                         |                    | Rain-forest          | Urban forest | Swamp forest | Mangrove | Fresh-water swamp | Coastal forest |
| <b>Rainforest</b>       | 42.79              |                      |              |              |          |                   |                |
| <b>Urban forest</b>     | 15.91              | 4.79                 |              |              |          |                   |                |
| <b>Swamp forest</b>     | 42.93              | 21.56                | 4.49         |              |          |                   |                |
| <b>Mangrove</b>         | 14.55              | 2.41                 | 3.75         | 3.04         |          |                   |                |
| <b>Freshwater swamp</b> | 22.41              | 3.25                 | 6.28         | 6.25         | 3.63     |                   |                |
| <b>Coastal forest</b>   | 15.95              | 5.83                 | 12.09        | 6.19         | 7.65     | 12.16             |                |

**Table S9.** Species turnover and nestedness analysis reveal that the high dissimilarity is due more to turnover rather than nestedness, whether with singletons and doubletons removed, or species with less than 5 and 10 specimens. Pairwise turnover values are displayed in the bottom-left of the pairwise matrix while the nestedness values are in the top-right.

**No Singletons**

**Overall Dissimilarity: 0.944      Overall Turnover: 0.894      Overall Nestedness: 0.051**

|                  | Rainforest | Urban forest | Swamp forest | Mangrove | Freshwater swamp | Coastal forest |
|------------------|------------|--------------|--------------|----------|------------------|----------------|
| Rainforest       |            | 0.013        | 0.075        | 0.058    | 0.009            | 0.020          |
| Urban forest     | 0.911      |              | 0.031        | 0.099    | 0.005            | 0.107          |
| Swamp forest     | 0.693      | 0.918        |              | 0.098    | 0.030            | 0.002          |
| Mangrove         | 0.908      | 0.816        | 0.871        |          | 0.063            | 0.263          |
| Freshwater swamp | 0.953      | 0.889        | 0.928        | 0.876    |                  | 0.098          |
| Coastal forest   | 0.905      | 0.695        | 0.936        | 0.648    | 0.748            |                |

**No Doubletons**

**Overall Dissimilarity: 0.944      Overall Turnover: 0.892      Overall Nestedness: 0.052**

|                  | Rainforest | Urban forest | Swamp forest | Mangrove | Freshwater swamp | Coastal forest |
|------------------|------------|--------------|--------------|----------|------------------|----------------|
| Rainforest       |            | 0.015        | 0.078        | 0.060    | 0.010            | 0.020          |
| Urban forest     | 0.909      |              | 0.033        | 0.099    | 0.004            | 0.112          |
| Swamp forest     | 0.685      | 0.915        |              | 0.102    | 0.032            | 0.003          |
| Mangrove         | 0.906      | 0.816        | 0.868        |          | 0.064            | 0.268          |
| Freshwater swamp | 0.952      | 0.889        | 0.926        | 0.875    |                  | 0.101          |
| Coastal forest   | 0.903      | 0.687        | 0.934        | 0.643    | 0.744            |                |

**No Species <5 Specimens**

**Overall Dissimilarity: 0.944      Overall Turnover: 0.891      Overall Nestedness: 0.054**

|                  | Rainforest | Urban forest | Swamp forest | Mangrove | Freshwater swamp | Coastal forest |
|------------------|------------|--------------|--------------|----------|------------------|----------------|
| Rainforest       |            | 0.017        | 0.081        | 0.063    | 0.011            | 0.020          |
| Urban forest     | 0.905      |              | 0.037        | 0.099    | 0.004            | 0.118          |
| Swamp forest     | 0.677      | 0.912        |              | 0.107    | 0.035            | 0.004          |
| Mangrove         | 0.904      | 0.817        | 0.862        |          | 0.064            | 0.274          |
| Freshwater swamp | 0.950      | 0.889        | 0.922        | 0.875    |                  | 0.103          |
| Coastal forest   | 0.902      | 0.679        | 0.931        | 0.638    | 0.741            |                |

**No Species <10 Specimens**

**Overall Dissimilarity:** 0.945  
0.057

**Overall Turnover:** 0.888

**Overall Nestedness:**

|                         | <b>Rainforest</b> | <b>Urban forest</b> | <b>Swamp forest</b> | <b>Mangrove</b> | <b>Freshwater swamp</b> | <b>Coastal forest</b> |
|-------------------------|-------------------|---------------------|---------------------|-----------------|-------------------------|-----------------------|
| <b>Rainforest</b>       |                   | 0.023               | 0.082               | 0.069           | 0.014                   | 0.018                 |
| <b>Urban forest</b>     | 0.897             |                     | 0.041               | 0.099           | 0.003                   | 0.128                 |
| <b>Swamp forest</b>     | 0.665             | 0.907               |                     | 0.115           | 0.038                   | 0.005                 |
| <b>Mangrove</b>         | 0.898             | 0.818               | 0.856               |                 | 0.065                   | 0.282                 |
| <b>Freshwater swamp</b> | 0.944             | 0.890               | 0.917               | 0.876           |                         | 0.105                 |
| <b>Coastal forest</b>   | 0.899             | 0.665               | 0.927               | 0.632           | 0.742                   |                       |



**Table S10.** Rarefied species richness values and confidence intervals of data subset that could be assigned to ecological guilds.

| Habitat Type     | Rainforest  |       | Freshwater Swamp Forest |       | Urban Forest |      | Mangrove Forest |       |              |       |                     |       |                     |       |
|------------------|-------------|-------|-------------------------|-------|--------------|------|-----------------|-------|--------------|-------|---------------------|-------|---------------------|-------|
| Site             | Bukit Timah |       | Nee Soon                |       | Kent Ridge   |      | Pulau Ubin      |       | Sungei Buloh |       | Pulau Semakau (Old) |       | Pulau Semakau (New) |       |
| Ecological Guild | Mean        | C.I.  | Mean                    | C.I.  | Mean         | C.I. | Mean            | C.I.  | Mean         | C.I.  | Mean                | C.I.  | Mean                | C.I.  |
| Phytophages      | 181.80      | ±2.64 | 185.95                  | ±3.25 | 82.50        | NA   | 62.75           | ±2.23 | 60.60        | ±1.43 | 51.15               | ±1.89 | 31.15               | ±1.63 |
| Pollinators      | 8.15        | ±0.71 | 9.00                    | ±0.87 | 0.50         | NA   | 13.45           | ±1.28 | 17.40        | ±0.76 | 7.40                | ±1.41 | 9.10                | ±1.12 |
| Fungivores       | 137.95      | ±2.58 | 143.55                  | ±2.09 | 44.00        | NA   | 16.00           | ±1.62 | 19.05        | ±0.73 | 6.20                | ±1.05 | 3.10                | ±0.72 |
| Parasitoids      | 108.15      | ±2.22 | 57.60                   | ±2.2  | 114.50       | NA   | 40.25           | ±2.31 | 53.90        | ±1.52 | 29.90               | ±2.68 | 13.75               | ±1.62 |
| Predators        | 87.15       | ±2.71 | 98.50                   | ±1.05 | 61.50        | NA   | 130.40          | ±3.23 | 98.60        | ±1.63 | 85.95               | ±1.94 | 59.80               | ±2.64 |
| Haematophages    | 7.80        | ±0.76 | 18.65                   | ±0.76 | 0.00         | NA   | 21.65           | ±0.67 | 22.35        | ±0.83 | 12.05               | ±0.86 | 5.95                | ±0.43 |
| Detritivores     | 18.30       | ±1.37 | 27.15                   | ±1.17 | 9.00         | NA   | 34.20           | ±1.29 | 34.90        | ±0.87 | 26.65               | ±1.24 | 19.05               | ±1.01 |

**Table S11.** Species turnover ANOSIM analysis results indicate distinct communities in each habitat type for each ecological guild. Pairwise p-value outputs are displayed in the bottom-left of the pairwise matrix while the R-statistics are displayed at the top-right.

**Phytophages**

**Overall P:** 0.001

**Overall R:** 0.588

|              | Rainforest | Urban forest | Swamp forest | Mangrove |
|--------------|------------|--------------|--------------|----------|
| Rainforest   |            | 1.000        | 0.706        | 0.721    |
| Urban forest | 0.001      |              | 1.000        | 0.468    |
| Swamp forest | 0.001      | 0.029        |              | 0.665    |
| Mangrove     | 0.001      | 0.003        | 0.001        |          |

**Pollinators**

**Overall P:** 0.001

**Overall R:** 0.836

|              | Rainforest | Swamp forest | Mangrove |
|--------------|------------|--------------|----------|
| Rainforest   |            | 0.387        | 0.915    |
| Swamp forest | 0.127      |              | 0.853    |
| Mangrove     | 0.001      | 0.004        |          |

**Fungivores**

**Overall P:** 0.001

**Overall R:** 0.351

|              | Rainforest | Urban forest | Swamp forest | Mangrove |
|--------------|------------|--------------|--------------|----------|
| Rainforest   |            | 1.000        | 0.726        | 0.435    |
| Urban forest | 0.001      |              | 1.000        | 0.088    |
| Swamp forest | 0.001      | 0.029        |              | 0.432    |
| Mangrove     | 0.001      | 0.206        | 0.001        |          |

**Parasitoids**

**Overall P:** 0.001

**Overall R:** 0.758

|              | Rainforest | Urban forest | Swamp forest | Mangrove |
|--------------|------------|--------------|--------------|----------|
| Rainforest   |            | 0.962        | 0.925        | 0.793    |
| Urban forest | 0.001      |              | 1.000        | 0.736    |
| Swamp forest | 0.018      | 0.067        |              | 0.711    |
| Mangrove     | 0.001      | 0.001        | 0.006        |          |

**Predators**

**Overall P:** 0.001

**Overall R:** 0.906

|              | Rainforest | Urban forest | Swamp forest | Mangrove |
|--------------|------------|--------------|--------------|----------|
| Rainforest   |            | 1.000        | 0.414        | 0.954    |
| Urban forest | 0.001      |              | 1.000        | 0.916    |
| Swamp forest | 0.109      | 0.067        |              | 0.913    |
| Mangrove     | 0.001      | 0.001        | 0.002        |          |

### Haematophages

Overall P: 0.001

Overall R: 0.905

|              | Rainforest | Swamp forest | Mangrove |
|--------------|------------|--------------|----------|
| Rainforest   |            | 0.435        | 0.957    |
| Swamp forest | 0.139      |              | 0.791    |
| Mangrove     | 0.001      | 0.002        |          |

### Detritivores

Overall P: 0.001

Overall R: 0.853

|              | Rainforest | Urban forest | Swamp forest | Mangrove |
|--------------|------------|--------------|--------------|----------|
| Rainforest   |            | 0.613        | 0.487        | 0.949    |
| Urban forest | 0.008      |              | 1.000        | 0.904    |
| Swamp forest | 0.056      | 0.100        |              | 0.614    |
| Mangrove     | 0.001      | 0.001        | 0.002        |          |

**Table S12.** Species turnover SIMPER analysis results indicate distinct communities in each habitat type for each ecological guild.

**Phytophages**

|                     | Within habitat (%) | Between habitats (%) |              |              |          |
|---------------------|--------------------|----------------------|--------------|--------------|----------|
|                     |                    | Rainforest           | Urban forest | Swamp forest | Mangrove |
| <b>Rainforest</b>   | 30.46              |                      |              |              |          |
| <b>Urban forest</b> | 27.72              | 4.93                 |              |              |          |
| <b>Swamp forest</b> | 34.21              | 18.38                | 5.18         |              |          |
| <b>Mangrove</b>     | 12.37              | 1.29                 | 4.13         | 1.67         |          |

**Pollinators**

|                     | Within habitat (%) | Between habitats (%) |              |          |
|---------------------|--------------------|----------------------|--------------|----------|
|                     |                    | Rainforest           | Swamp forest | Mangrove |
| <b>Rainforest</b>   | 41.27              |                      |              |          |
| <b>Swamp forest</b> | 48.30              | 28.15                |              |          |
| <b>Mangrove</b>     | 26.01              | 0.88                 | 3.57         |          |

**Fungivores**

|                     | Within habitat (%) | Between habitats (%) |              |              |          |
|---------------------|--------------------|----------------------|--------------|--------------|----------|
|                     |                    | Rainforest           | Urban forest | Swamp forest | Mangrove |
| <b>Rainforest</b>   | 32.01              |                      |              |              |          |
| <b>Urban forest</b> | 31.71              | 4.48                 |              |              |          |
| <b>Swamp forest</b> | 36.88              | 19.40                | 4.61         |              |          |
| <b>Mangrove</b>     | 10.58              | 1.87                 | 8.26         | 1.34         |          |

**Parasitoids**

|                     | Within habitat (%) | Between habitats (%) |              |              |          |
|---------------------|--------------------|----------------------|--------------|--------------|----------|
|                     |                    | Rainforest           | Urban forest | Swamp forest | Mangrove |
| <b>Rainforest</b>   | 27.47              |                      |              |              |          |
| <b>Urban forest</b> | 10.13              | 3.18                 |              |              |          |
| <b>Swamp forest</b> | 59.26              | 10.76                | 1.14         |              |          |
| <b>Mangrove</b>     | 12.00              | 2.40                 | 2.43         | 2.84         |          |

### Predators

|                     | Within habitat (%) | Between habitats (%) |              |              |          |
|---------------------|--------------------|----------------------|--------------|--------------|----------|
|                     |                    | Rainforest           | Urban forest | Swamp forest | Mangrove |
| <b>Rainforest</b>   | 29.22              |                      |              |              |          |
| <b>Urban forest</b> | 34.03              | 4.60                 |              |              |          |
| <b>Swamp forest</b> | 64.88              | 19.72                | 3.62         |              |          |
| <b>Mangrove</b>     | 22.78              | 0.28                 | 1.35         | 1.20         |          |

### Haematophages

|                     | Within habitat (%) | Between habitats (%) |              |          |
|---------------------|--------------------|----------------------|--------------|----------|
|                     |                    | Rainforest           | Swamp forest | Mangrove |
| <b>Rainforest</b>   | 18.86              |                      |              |          |
| <b>Swamp forest</b> | 56.42              | 10.55                |              |          |
| <b>Mangrove</b>     | 27.40              | 0.61                 | 9.27         |          |

### Detritivores

|                     | Within habitat (%) | Between habitats (%) |              |              |          |
|---------------------|--------------------|----------------------|--------------|--------------|----------|
|                     |                    | Rainforest           | Urban forest | Swamp forest | Mangrove |
| <b>Rainforest</b>   | 14.99              |                      |              |              |          |
| <b>Urban forest</b> | 20.18              | 7.12                 |              |              |          |
| <b>Swamp forest</b> | 52.77              | 9.49                 | 1.67         |              |          |
| <b>Mangrove</b>     | 18.87              | 0.37                 | 1.33         | 6.91         |          |

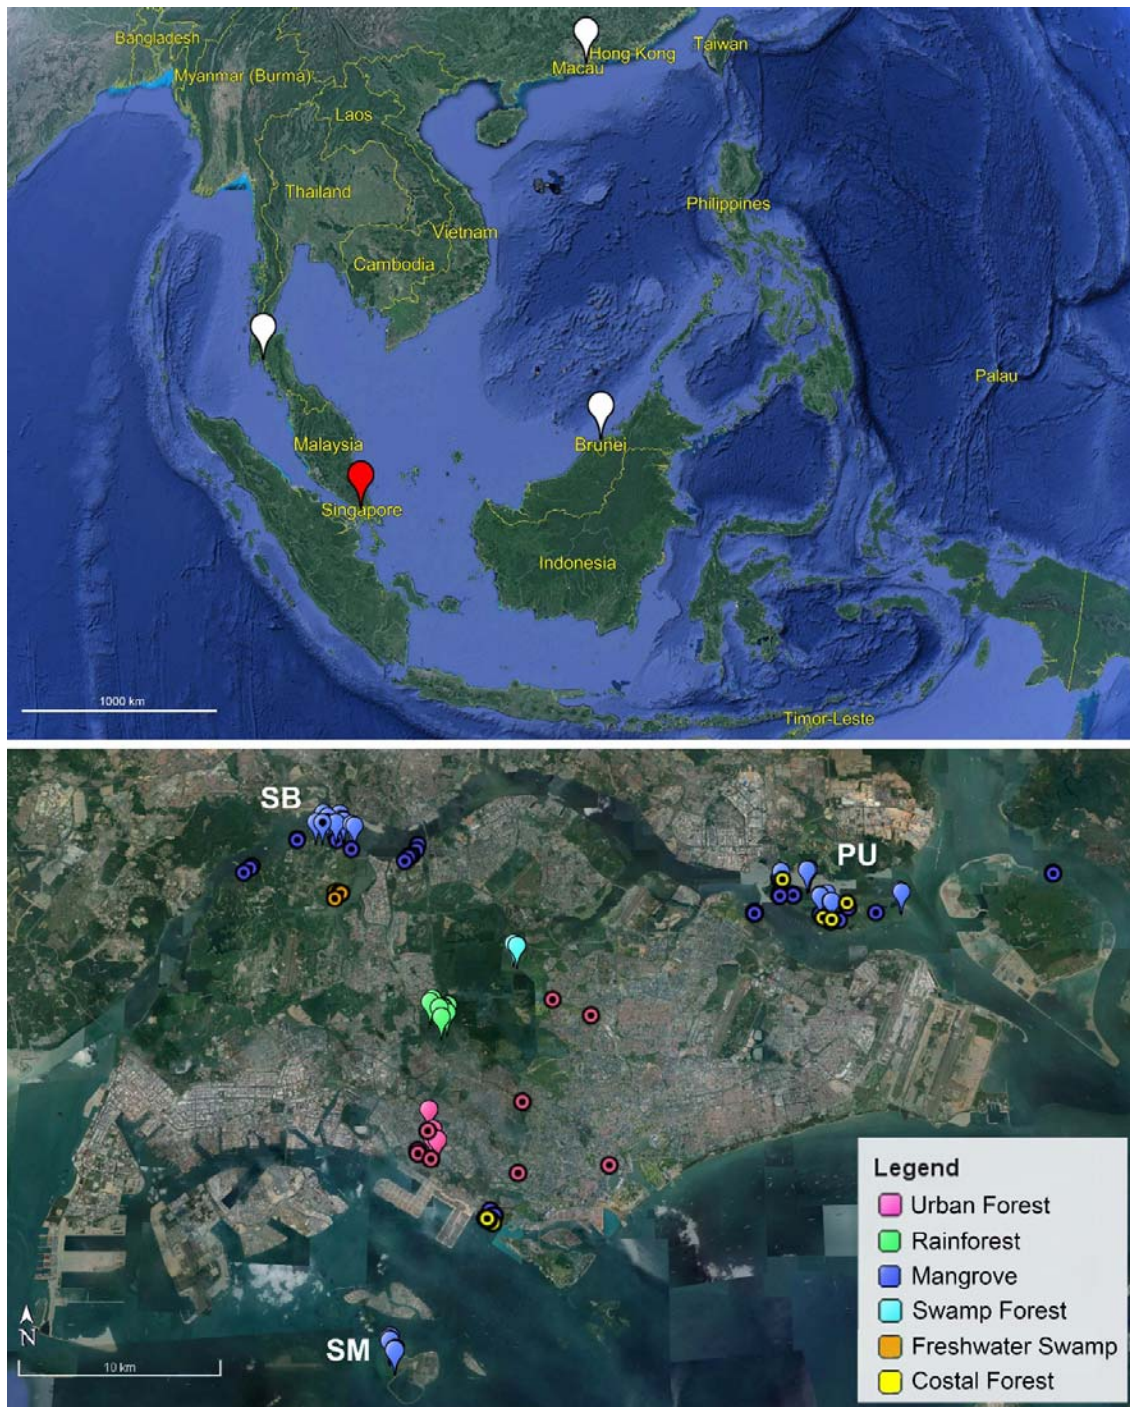

**Figure S1.** Sampling localities in the Oriental Realm (*top*: Singapore, red; other countries, white) and within Singapore (*bottom*: circular markers indicate trapping sites excluded from the species turnover analyses; pin markers with dot indicate traps excluded from guild-level analyses).

**Figure S2.** Arthropod orders sampled with Malaise traps in this study and their species proportions. The number beside each order indicates the number of species sampled based on 3% p-distance objective clustering.

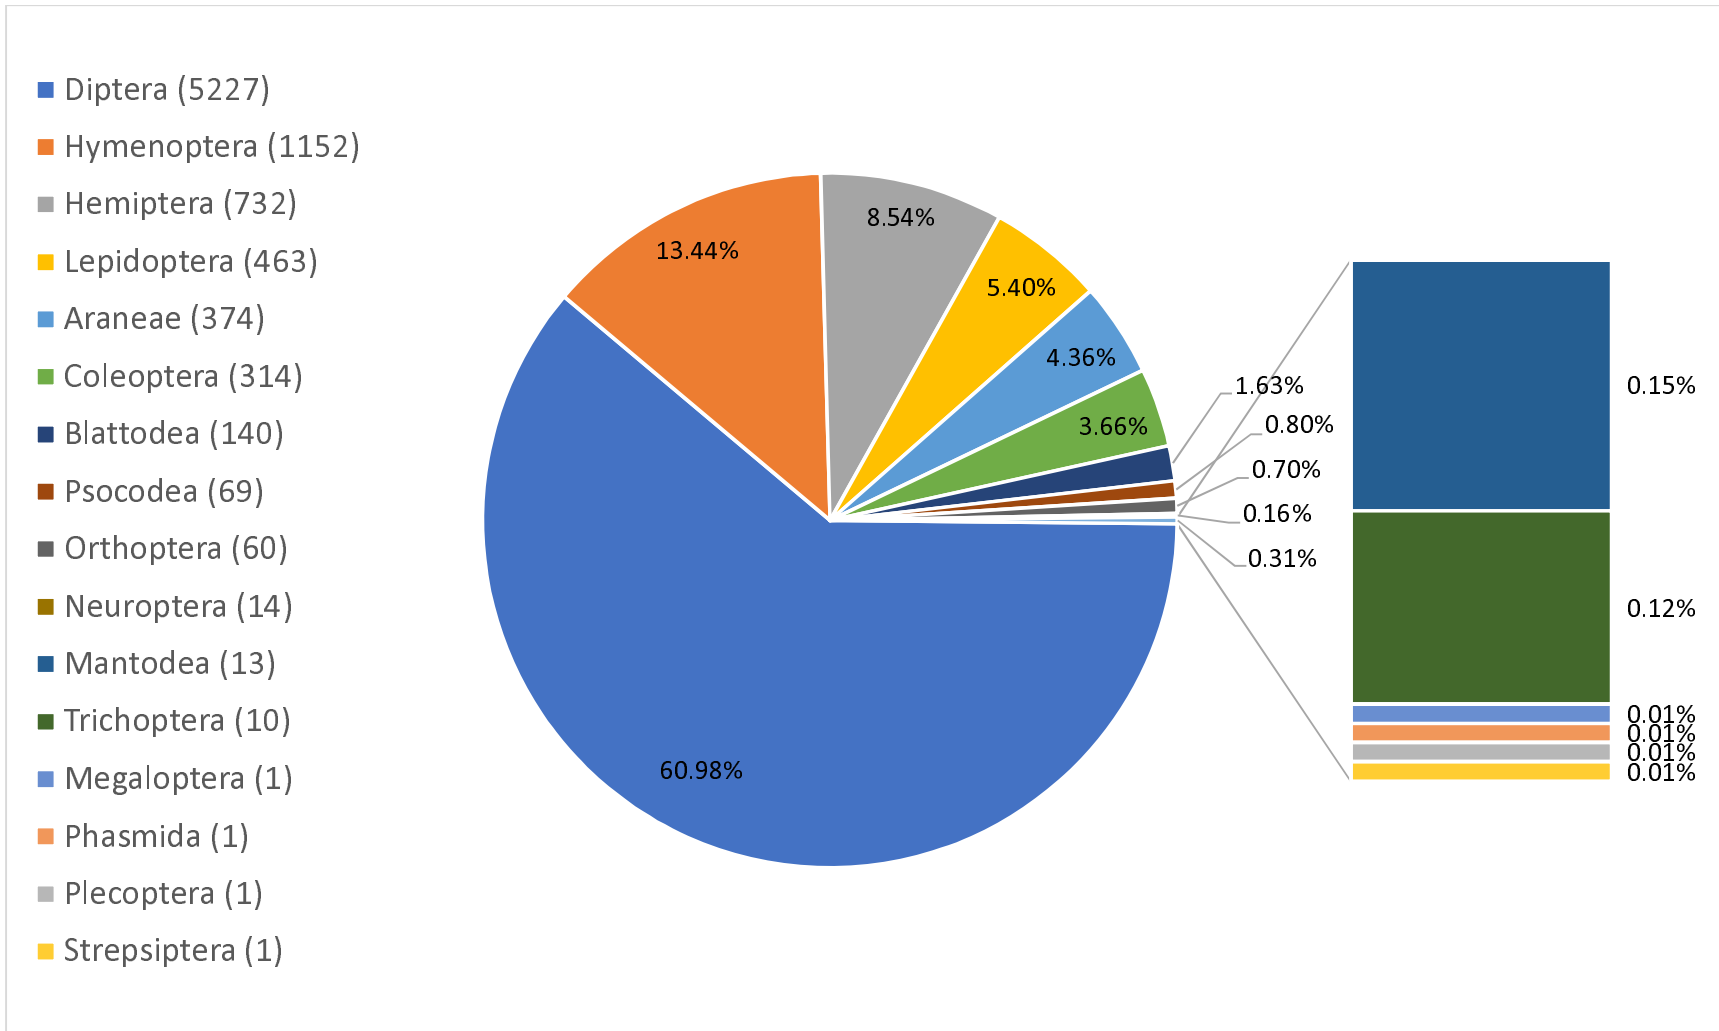

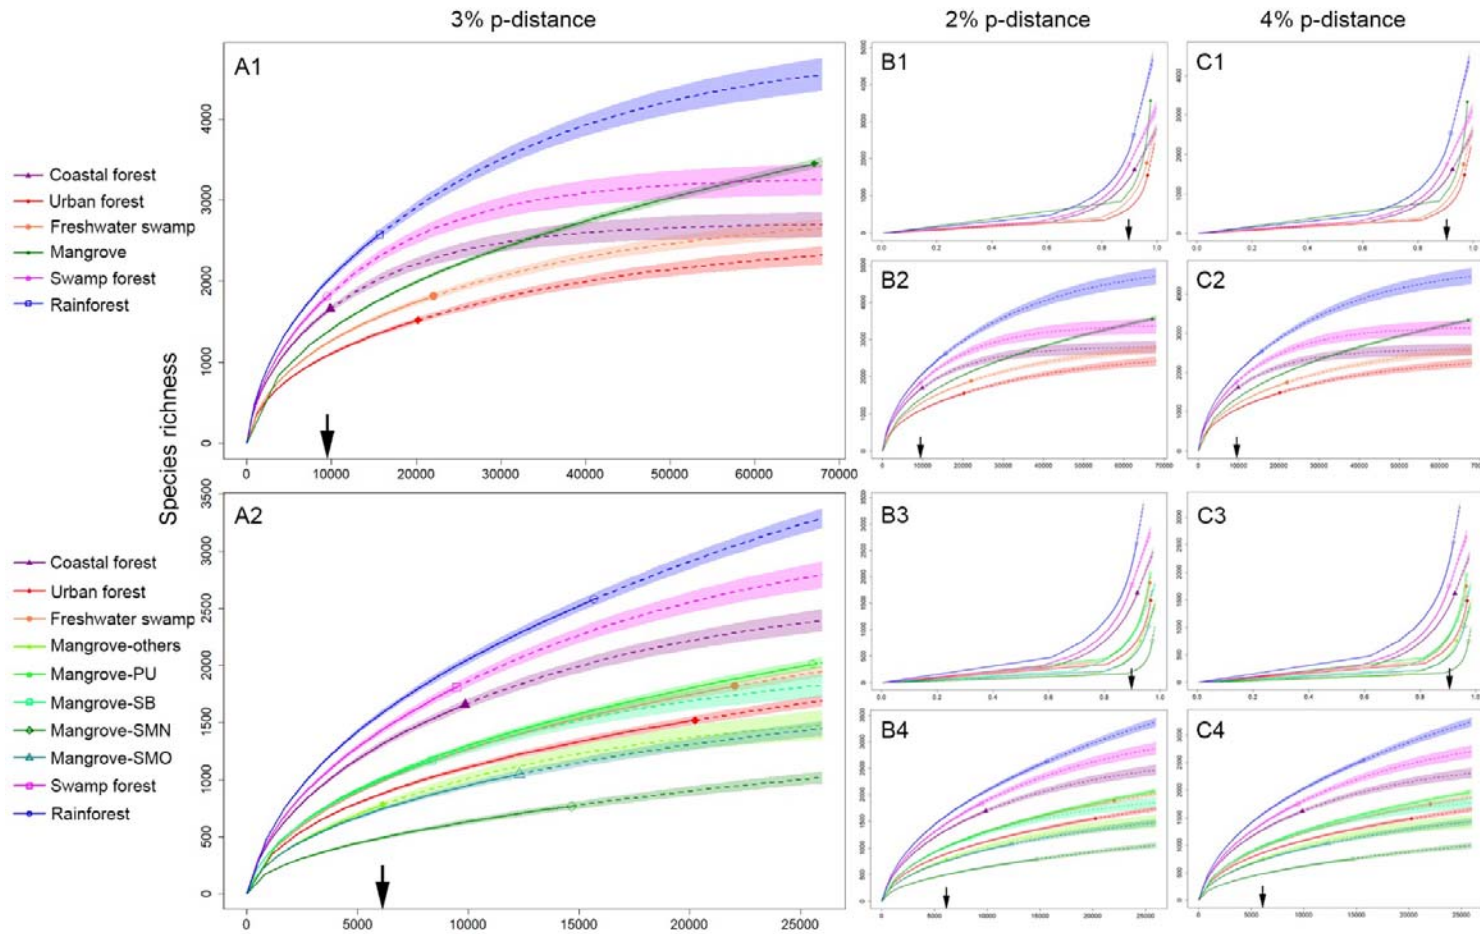

**Figure S3.** Insect alpha-diversity across tropical forest habitats rarefied by specimens (A1 & 2, B2 & 4, C2 & 4) and coverage (B1 & 3, C1 & 3), for 2% (B1 – 4), 3% (A1 – 2) and 4% (C1 – 4) p-distances mOTUs. Mangroves are treated as a single habitat (top) and split by site in a separate analysis (bottom): Pulau Ubin (PU), Sungei Buloh (SB), Pulau Semakau old grove (SMO), Pulau Semakau new grove (SMN); solid lines = rarefaction; dotted = extrapolations. The arrow on the x-axis indicate the point of rarefaction at which species richness comparisons were made.



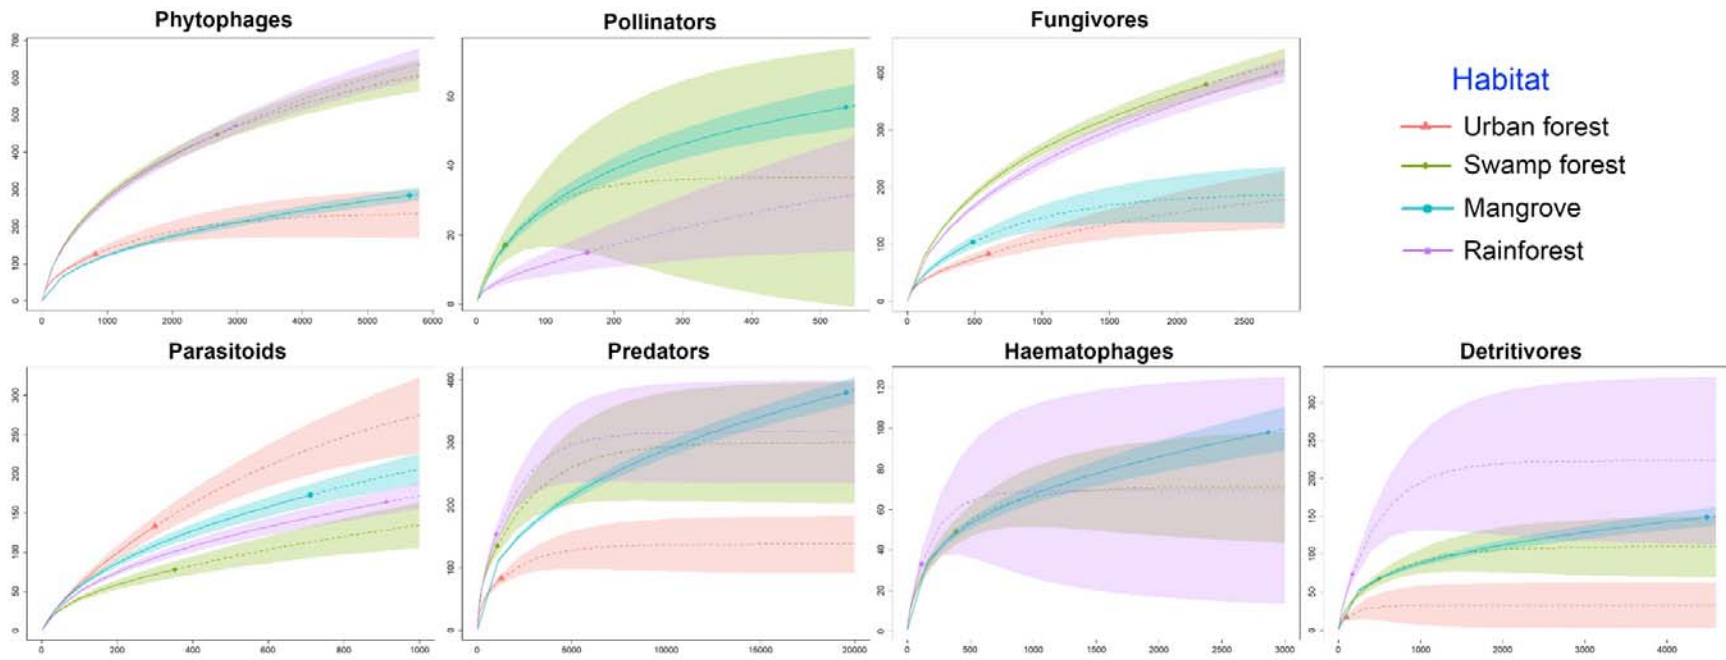

**Figure S4.** Comparison of species diversity across habitats (3% p-distance mOTUs) split by ecological guild. Curves were plotted for the mangrove sites as a single habitat type. The full lines represent rarefactions, while the dotted lines extrapolations and the point between the lines as actual observed values.

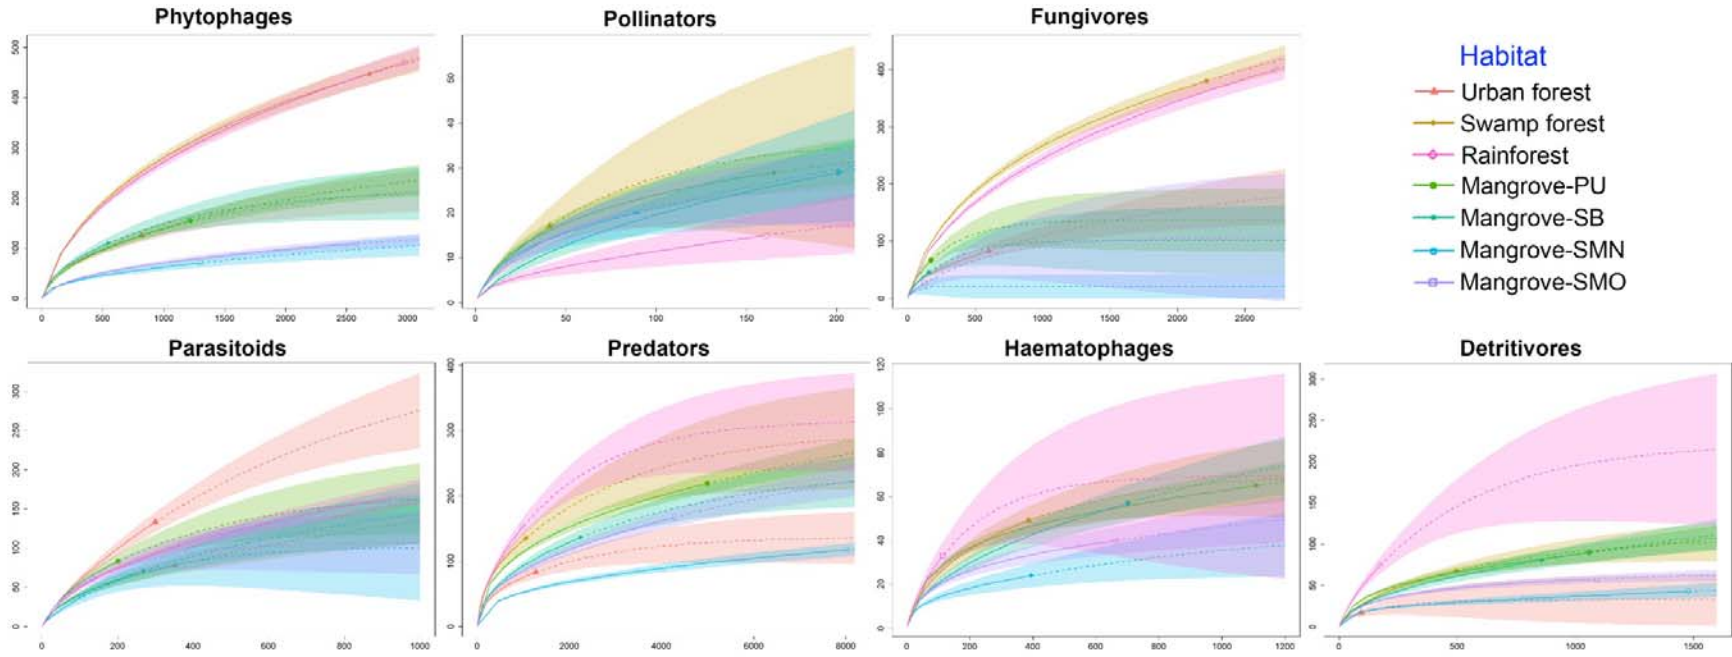

**Figure S5.** Comparison of species diversity across habitats (3% p-distance mOTUs) split by ecological guild. Mangrove sites are represented by Pulau Ubin (PU), Sungei Buloh (SB), Pulau Semakau old grove (SMO), Pulau Semakau new grove (SMN). Curves were plotted for the mangrove sites as separate sites. The full lines represent rarefactions, while the dotted lines extrapolations and the point between the lines as actual observed values.

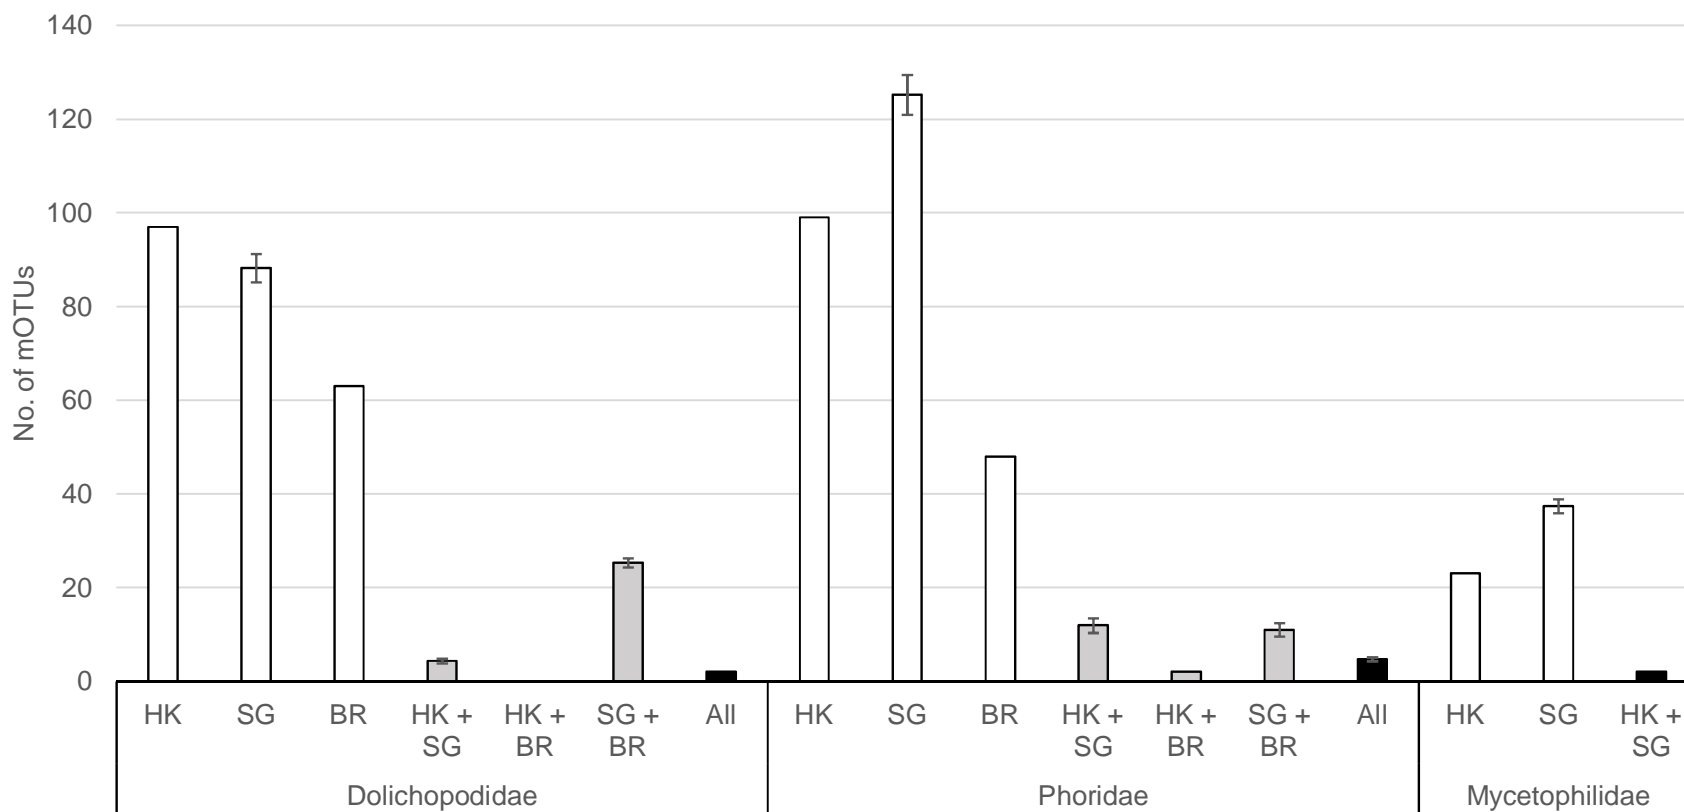

**Figure S6.** High species diversity and turnover for mangroves from Singapore, Brunei, and Hong Kong based on three Diptera families. Singapore data are rarefied to specimen numbers from Brunei and HK (error bars = 95% confidence intervals).

## References

1. Wong, H. F. *et al.* Checklist of the plant species of Nee Soon swamp forest, Singapore: Bryophytes to Angiosperms. *Natl. Parks Board Raffles Mus. Biodivers. Res. Natl. Univ. Singap. Singap.* (2013).
2. Ho, B. C. *et al.* The plant diversity in Bukit Timah Nature Reserve, Singapore. *Gard. Bull. Singap.* **71**, 41–144 (2019).
3. Tan, H. T. W., Lim, K. K. P., Tan, M. K. & Yee, A. T. K. The Biology of Kent Ridge: Vegetation, Plants and Animals. in *Kent Ridge: An Untold Story* 49–172 (NUS Press, 2019).
4. Lee, S., Leong', S. A. P., Ibrahim', A. & Gwee', A.-T. A Botanical Survey of Chek Jawa, Pulau Ubin, Singapore. *Gard. Bull. Singap.* **55**, 271–307 (2003).
5. Tan, H. T. W. *et al.* A botanical survey of Sungei Buloh Nature Park, Singapore. *Gard. Bull.* **49**, 15–35 (1997).
6. Teo, S. *et al.* The flora of Pulau Semakau: A Project Semakau checklist. *Nat. Singap.* **4**, 263–272 (2011).
